# Supplementary material for: Effect of Physical Activity Coaching on Acute Care and Survival Among Patients With Chronic Obstructive Pulmonary Disease: A Pragmatic Randomized Clinical Trial
Source: PubMed Central journal article supplement (PMC6704745; doi:10.1001/jamanetworkopen.2019.9657), 2019-08-16
Supplement: jamanetwopen-2-e199657-s001.pdf [file jamanetwopen-2-e199657-s001.pdf]

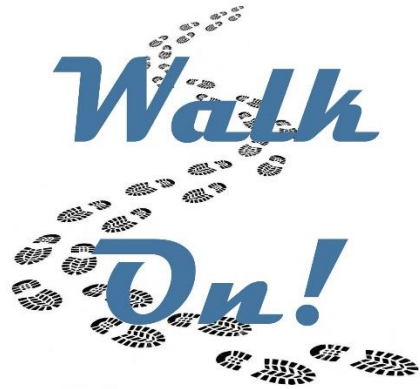

1  
2  
3  
4  
5  
6  
7  
8  
9  
10  
11

# PATIENT-CENTERED PHYSICAL ACTIVITY COACHING IN COPD: A PRAGMATIC TRIAL

## Study Protocol

Updated December 2018

12 **Table of Contents**

13

14 EXECUTIVE SUMMARY ..... 3

15 BACKGROUND ..... 5

16 SPECIFIC AIMS ..... 5

17 STUDY DESIGN AND METHODS ..... 6

18 Study Setting ..... 6

19 Overview of Design ..... 6

20 Identifying Eligible Patients from the EMR ..... 8

21 Randomization ..... 10

22 Consent and Passive Monitoring ..... 11

23 Standard Care (SC) Control ..... 11

24 Rationale for Standard Care as a Comparator ..... 11

25 Study Procedures ..... 11

26 Walk On! Physical Activity Coaching Intervention ..... 12

27 Measures and Outcomes ..... 21

28 Analytical Plan ..... 24

29 Sample Size Estimates ..... 26

30 Safety Monitoring ..... 27

31 Project Milestones and Timeline ..... 27

32 REFERENCES ..... 28

33

34

35

36

37

38

39 **EXECUTIVE SUMMARY**

40  
41 **BACKGROUND**

42 Chronic obstructive pulmonary disease (COPD) is the third leading cause of the death in the US. The  
43 personal, social and economic costs of the disease are tremendous, with annual expenditures of nearly  
44 \$50 billion, mostly from hospitalizations for exacerbations of COPD. For the vast majority of patients,  
45 despite optimal pharmacological therapy, living with COPD is characterized by unrelieved dyspnea,  
46 physical inactivity, deconditioning, and an insidious downward spiral of social isolation and depression.  
47 There is mounting epidemiological evidence that physical inactivity is associated with more frequent  
48 hospitalizations and increased mortality in COPD even after adjusting for disease severity. The evidence  
49 is unequivocal that intensive supervised exercise training as part of pulmonary rehabilitation improves  
50 outcomes of importance to patients. However, patient participation in supervised exercise at center-  
51 based rehabilitation programs is very low (1-3% of eligible patients) which undermines the wide scale  
52 adoption of this approach in real world clinical settings for large numbers of patients. A paradigm shift is  
53 needed in the non-pharmacological care of COPD from traditional rehabilitation to a more patient-  
54 centered, scalable, and sustainable model of promoting active lifestyles to improve outcomes for COPD  
55 and its common co-morbidities. Identifying alternative, more flexible models that honors patients’  
56 preferences and needs is of intense interest to patients and their caregivers.  
57

58 **OBJECTIVES**

59 We propose a pragmatic randomized controlled trial in a large integrated health care system to  
60 determine the effectiveness of a 12-month patient-centered, physical activity coaching intervention  
61 (Walk On!) for patients with COPD on the primary composite outcome of all-cause hospitalizations,  
62 emergency department (ED) visits, observation stays and death compared to standard care. We will  
63 also examine the secondary outcomes of physical activity, symptom burden, quality of life, COPD-related  
64 health care utilization, and cardio-metabolic markers. The long-term objective is to scale-up and spread  
65 the implementation of this model into existing care management efforts across Kaiser Permanente and  
66 other health care systems should the findings be positive.  
67

68 **METHODS**

69 A randomized controlled design was used to test the effectiveness of Walk On! compared to standard  
70 care (SC) in patients with a history of COPD-related hospitalization, ED or observation visits in the  
71 previous 12 months. Eligible patients (n=1650; revised to 2707) were automatically identified from our  
72 electronic medical records (EMR) system and randomized to either the Walk On! program or SC from  
73 July 2015-July 2017. SC patients continue to have access to all the health services they would receive  
74 such as a readmission reduction bundle, pulmonary rehabilitation, and health education programs. Walk  
75 On! patients will receive SC plus the individually tailored Walk On! program over 12 months which  
76 includes four components: baseline orientation/functional assessment, intensive coaching, and pro-  
77 active professional and peer support and monitoring via semi-automated outreach by telephone or  
78 Internet as well as group visits. Outcomes will be analyzed using conventional statistical methods for  
79 binary and continuous variables and according to intention to treat principles. We will also examine  
80 heterogeneity of effects in patient subgroups.  
81

82 **PATIENT OUTCOMES**

83 Our primary composite outcome will be all-cause hospitalizations, emergency department (ED) visits,  
84 observation stays and death in the 12 months following enrollment in Walk On! Secondary outcomes  
85 include physical activity, COPD-related health care utilization, and cardio-metabolic markers such as

86 BMI, blood pressure, HbA1c, and lipids, all of which will be automatically captured from our EMR  
87 system; we will also measure patients' symptom burden, quality of life, perception of support, and  
88 satisfaction using mail, phone or web surveys. These outcomes were selected based on patients'  
89 expressed desires to remain independent for as long as possible in the face of a progressive illness.  
90

#### 91 **PATIENT AND STAKEHOLDER ENGAGEMENT**

92 The research team has engaged all relevant stakeholders including patients, family members, front line  
93 clinicians, administrators, and executive health system leadership from the proposal development stage  
94 to the planning/start-up, implementation, evaluation, and dissemination activities. A Patient and Family  
95 Advisory Board (PAB) met via telephone conference once a month to discuss study progress and  
96 partnered with the research team to address any study-related issues and challenges as they unfolded.  
97 In addition to the monthly calls, the PAB and health system partners met in person in Year 1 to inform  
98 the final study protocol, in Year 2 to refine the study processes and implementation, in Year 3 to  
99 celebrate the end of recruitment and plan for possible dissemination activities, and in Year 4 to review  
100 the study findings and strategize on next steps.  
101

#### 102 **ANTICIPATED IMPACT**

103 A pragmatic trial of physical activity coaching in high risk COPD patients is unprecedented. If successful,  
104 findings from this study could re-define the standard of care for patients with COPD to more aggressive  
105 management of physical inactivity in community and home-based settings in contrast to the current  
106 highly inaccessible gold standard center-based pulmonary rehabilitation programs. The Walk On!  
107 program could potentially provide patients and their families an effective alternative care model that  
108 meets their preferences and needs and payers will be able to invest in a more scalable intervention with  
109 more durable effects. Generating rigorous evidence regarding the impact of patient-centered  
110 behavioral interventions for individuals with multiple chronic conditions significantly advances PCORI's  
111 mission of assisting diverse stakeholders in making more informed decisions that reflect their desired  
112 health outcomes.  
113

#### 114 **PARTICIPATING KAISER PERMANENTE SOUTHERN CALIFORNIA MEDICAL CENTERS**

115 Downey, LAMC, Orange County, Riverside, Fontana, and San Diego (South Bay and West Los Angeles  
116 added in 2017)  
117

#### 118 **CORE INVESTIGATORS**

119 Huong Nguyen, PhD, RN (PI); Michael Gould, MD, MS; Karen Coleman, PhD; Smita Desai, DO; William  
120 Towner, MD; Anny Xiang, PhD; Marilyn Moy, MD, MS  
121

#### 122 **PATIENT and FAMILY ADVISORY BOARD**

123 Ms. Adrienne Bailey (deceased), Mr. Kenneth Desjardins (deceased), Ms. Leslie Paskus, Ms. Freida  
124 Miller, Ms. Reta Coulombe, Ms. Gloria Miller, Mr. Ronald Fox (deceased), Ms. Susan Barlett, and Ms.  
125 Bonnie Tomeoni  
126

#### 127 **DATA SAFETY MONITORING BOARD MEMBERS**

128 Kevin Cain, PhD, David Au, MD, MPH, Barbara Sternfeld, PhD  
129

#### 130 **REGULATORY**

131 KPSC Institutional Review Board Protocol: #10697  
132 clinicaltrials.gov registration: #NCT02478359

133 **BACKGROUND**

134 Chronic obstructive pulmonary disease (COPD) is the third leading cause of the death in the US.<sup>1</sup>  
135 The personal, social and economic costs of the disease are tremendous, with annual expenditures of  
136 nearly \$50 billion, mostly from hospitalizations for exacerbations of COPD and associated sequelae.<sup>2</sup> For  
137 the vast majority of patients, despite optimal pharmacological therapy, living with COPD is characterized  
138 by unrelieved dyspnea, physical inactivity, deconditioning, and an insidious downward spiral of social  
139 isolation and depression that has a profound impact on the lives of patients and their caregivers.<sup>3,4</sup>

140  
141 Physical inactivity is significantly associated with more frequent hospitalizations and increased  
142 mortality in COPD even after adjusting for disease severity.<sup>5-10</sup> Our recent findings further extend these  
143 observations by showing that hospitalized COPD patients who reported engaging in any level of  
144 moderate to vigorous exercise prior to the index admission had a 34% lower risk of 30-day readmission  
145 compared to inactive patients.<sup>11</sup> Reducing 30-day hospital readmissions has become a major focus of  
146 many health care systems, with most efforts targeted at addressing deficiencies in care transitions and  
147 short-term outpatient management following discharge.<sup>12-14</sup> Missing from many of these efforts is the  
148 recognition that a majority of hospitalizations for chronic illnesses like COPD reflect failures in aggressive  
149 and proactive outpatient management of COPD exacerbations, comorbidities, and behavioral risk  
150 factors.

151  
152 The evidence is unequivocal that pulmonary rehabilitation (PR) improves symptoms, health-  
153 related quality of life, and exercise capacity in COPD.<sup>15,16</sup> While PR has been a guideline-recommended  
154 therapy since 2001 and is a Medicare covered benefit, uptake remains suboptimal, with only 1-3% of  
155 eligible patients ever participating.<sup>17,18</sup> The organizational, provider, and patient-level barriers to  
156 participation are well-known, persistent, and remain inadequately addressed.<sup>17-19</sup> Moreover, gains from  
157 PR have a predictable decay over 6-12 months since most patients are not able to sustain these lifestyle  
158 changes independently in the face of a chronic progressive illness.<sup>15,20-22</sup> Novel approaches that  
159 overcome limitations of the current model are desperately needed in order to achieve the triple aim of  
160 more patient-centered care, with better outcomes at lower cost, for the vast majority of patients who  
161 currently cannot access PR.

162  
163 There is significant recent interest and focus on testing lifestyle PA interventions.<sup>23,24</sup> Several  
164 different PA intervention models have been tested by us and others that combine various elements of  
165 supervised<sup>25,26</sup> and independent exercise<sup>27</sup>, some with the use of pedometers<sup>28-31</sup> alone or in  
166 combination with a motivational Internet-enabled platform<sup>32-34</sup> and telephone based coaching.<sup>26,28,31,32</sup>  
167 Together, findings from these published studies suggest that patients with COPD can increase their PA.  
168 Despite the growing evidence base for PA interventions, there is a critical gap regarding the real-world  
169 effectiveness of improving PA in large representative samples of older adults with COPD and its impact  
170 on widely accepted clinical endpoints.

171  
172 **SPECIFIC AIMS**

- 173 1. Refine a patient-centered physical activity coaching (Walk On!) intervention model to improve  
174 outcomes for patients with COPD who are at high risk for hospitalization.
- 175 2. Conduct a pragmatic randomized controlled trial to determine the effectiveness of the Walk On!  
176 intervention compared to standard care on the primary composite outcome of all-cause  
177 hospitalizations, observation stays, emergency department visits, and mortality and secondary  
178 outcomes of COPD-related hospitalizations, observation stays and emergency department visits,

179 number of outpatient treated COPD exacerbations, physical activity, cardio-metabolic markers,  
 180 symptoms, and health-related quality of life.  
 181 Hypothesis: Patients randomized to Walk On! will have a 7% (revised: 5.5%) absolute reduction in  
 182 the primary composite outcome in the 12 months after randomization compared to standard care  
 183 patients. Walk On! patients will also have increased physical activity, fewer COPD-related  
 184 encounters, better cardio-metabolic markers, lower symptoms, and improved quality of life.  
 185 3. Examine the effectiveness of Walk On! in patient subgroups (presence of multi morbidities, level of  
 186 social support, gender, race/ethnicity, and access to the Internet).  
 187 4. Use mixed methods to understand the barriers and facilitators of successful uptake of the Walk On!  
 188 intervention components.  
 189

## 190 STUDY DESIGN AND METHODS

### 191 Study Setting

192 Kaiser Permanente Southern California (KPSC) is a large integrated health care system that  
 193 provides comprehensive health care services for approximately 1 in 5 Southern California residents (~4.5  
 194 million members). Kaiser Permanente is the largest real-world care setting in the nation and the ideal  
 195 test-bed to conduct cost-effective pragmatic trials of innovative lifestyle behavioral models. Members  
 196 enroll through the Kaiser Foundation Health Plan for prepaid health care insurance. KPSC provides care  
 197 at 14 hospitals, 16 medical service areas, and nearly 200 medical offices through a partnership of more  
 198 than 6,000 physicians. There is a robust and comprehensive electronic medical record system (Epic™)  
 199 and online patient health portal (kp.org).  
 200

### 201 Overview of Design

202 A conceptual model guiding this study is illustrated in Figure 1. We hypothesize that increased  
 203 physical activity leads to improvements in both physiological (decreased ventilatory requirements and  
 204 breathlessness, improved cardio-metabolic management, and lower levels of inflammation) and  
 205 psychological (improved mood, lower anxiety and increased self-efficacy for self-care) factors. Changes  
 206 in these mediators are associated with increased quality of life, fewer COPD exacerbations, decreased  
 207 acute care utilization, and improved survival.  
 208

209 Figure 1. Walk On! Conceptual Model

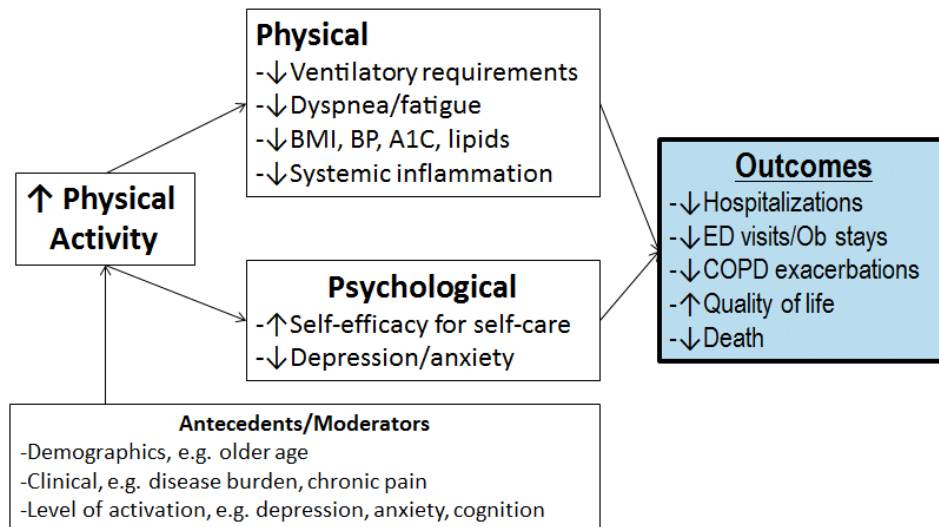

210

211 This study is a pragmatic randomized controlled trial to determine the effectiveness of a physical  
 212 activity coaching intervention (Walk On!) compared to standard care for patients at high risk for COPD  
 213 exacerbations (Figure 2). Our research question, study design, and proposed methods are aligned with  
 214 methodological standards for pragmatic or real-world clinical trials (Table 1).<sup>35</sup> We used automated  
 215 methods to identify approximately 1,650 (revised to 2,707) eligible patients with a COPD-related  
 216 hospitalization, emergency department visit, or overnight observation stay in the previous 12 months  
 217 from KPSC electronic medical records system (EMR) and randomized patients in a 1:1 ratio to the Walk  
 218 On! intervention or standard care. Patients randomized to Walk On! were approached by existing KPSC  
 219 clinical staff (respiratory therapists who served as physical activity coaches) to participate in the 12-  
 220 month physical activity coaching program. Patients randomized to standard care were not contacted  
 221 about the trial with the exception of a subgroup (n=250, revised to 537) who were invited to complete  
 222 surveys over 12 months. Patients were enrolled in waves over 24 months.

223  
 224 The primary outcome was a composite of all-cause hospitalizations, emergency department  
 225 visits, observation stays, and death in the 12 months following randomization. Secondary outcomes  
 226 included COPD-related encounters, cardio-metabolic markers (BMI, BP, HbA1C, and lipids), self-reported  
 227 physical activity, symptoms, health-related quality of life (HRQL), perception of support for PA, and  
 228 satisfaction with the program. All utilization and clinical outcomes were captured from the EMR.  
 229 Patient reported outcomes (PROs) were measured with standardized surveys.

230

| Table 1. PRECIS Pragmatic Study Design |                                                                                                                                                                           |                                                                                                                                                                                                                                                             |
|----------------------------------------|---------------------------------------------------------------------------------------------------------------------------------------------------------------------------|-------------------------------------------------------------------------------------------------------------------------------------------------------------------------------------------------------------------------------------------------------------|
| PRECIS Criteria                        | Criteria for Pragmatic Trials                                                                                                                                             | Physical Activity Coaching Trial (Walk On!)                                                                                                                                                                                                                 |
| Participants                           | All eligible participants enrolled, regardless of risk, responsiveness, comorbidities or past compliance.                                                                 | All adult health plan members who had a COPD hospitalization/ED visit/Ob Stay in the past 12 months (excluding patients who clearly would not benefit from Walk On) were enrolled.                                                                          |
| Intervention Condition                 | Interventions are highly flexible, offering providers leeway in formulation and application.                                                                              | Walk On! allowed for tailoring to patients' needs and preferences. Varying levels of participation were expected.                                                                                                                                           |
| Intervention Practitioners             | Interventions are applied by the full range of practitioners in the full range of settings with only ordinary attention to dose and side effects.                         | Intervention clinicians were recruited from the existing local workforce (respiratory therapists). The sites were responsible for selection and supervision of clinicians (using standard quality control tools).                                           |
| Comparison Condition                   | "Usual Practice" (or the best alternative), offering practitioners considerable leeway in application.                                                                    | Walk On! was compared to standard of care that members with COPD receive based on their existing health plan benefits.                                                                                                                                      |
| Comparison Practitioners               | The control intervention is applied by the full range of clinicians in the full range of settings, with only ordinary attention to training, experience, and performance. | Standard care was provided by real-world providers under usual practice conditions – with no additional training or supervision.                                                                                                                            |
| Follow-Up Assessments                  | There are no research assessments; existing databases are searched for outcomes.                                                                                          | All utilization and clinical data were collected from existing electronic medical records and insurance claims data. Limited patient-reported outcomes were collected from intervention patients and a randomly selected subgroup of standard care patients |
| Outcome Definition                     | The primary outcome is objectively measured, meaningful to study participants, and does not depend on central adjudication.                                               | Primary and secondary outcomes were defined by utilization, pharmacy, and clinical data (exercise; cardio-metabolic markers). No additional clinical assessment was required.                                                                               |
| Intervention Compliance                | There are no special strategies to improve compliance, and compliance is unobtrusively measured.                                                                          | Quality of implementation were assessed using a study dashboard.                                                                                                                                                                                            |

|                        |                                                                                                              |                                                                                                                         |
|------------------------|--------------------------------------------------------------------------------------------------------------|-------------------------------------------------------------------------------------------------------------------------|
| Practitioner Adherence | There are no special strategies to maintain practitioner adherence, and adherence is unobtrusively measured. | Clinical supervision of physical activity coaches are at the same intensity as any operational clinical programs.       |
| Primary Comparison     | The analysis includes all patients regardless of compliance, eligibility, or others.                         | All outcomes will be analyzed according to initial assignment – regardless of intervention participation or compliance. |

231  
232 Figure 2. Walk On! Study Design  
233

### Patient-Centered Physical Activity Coaching for COPD: A Pragmatic Trial

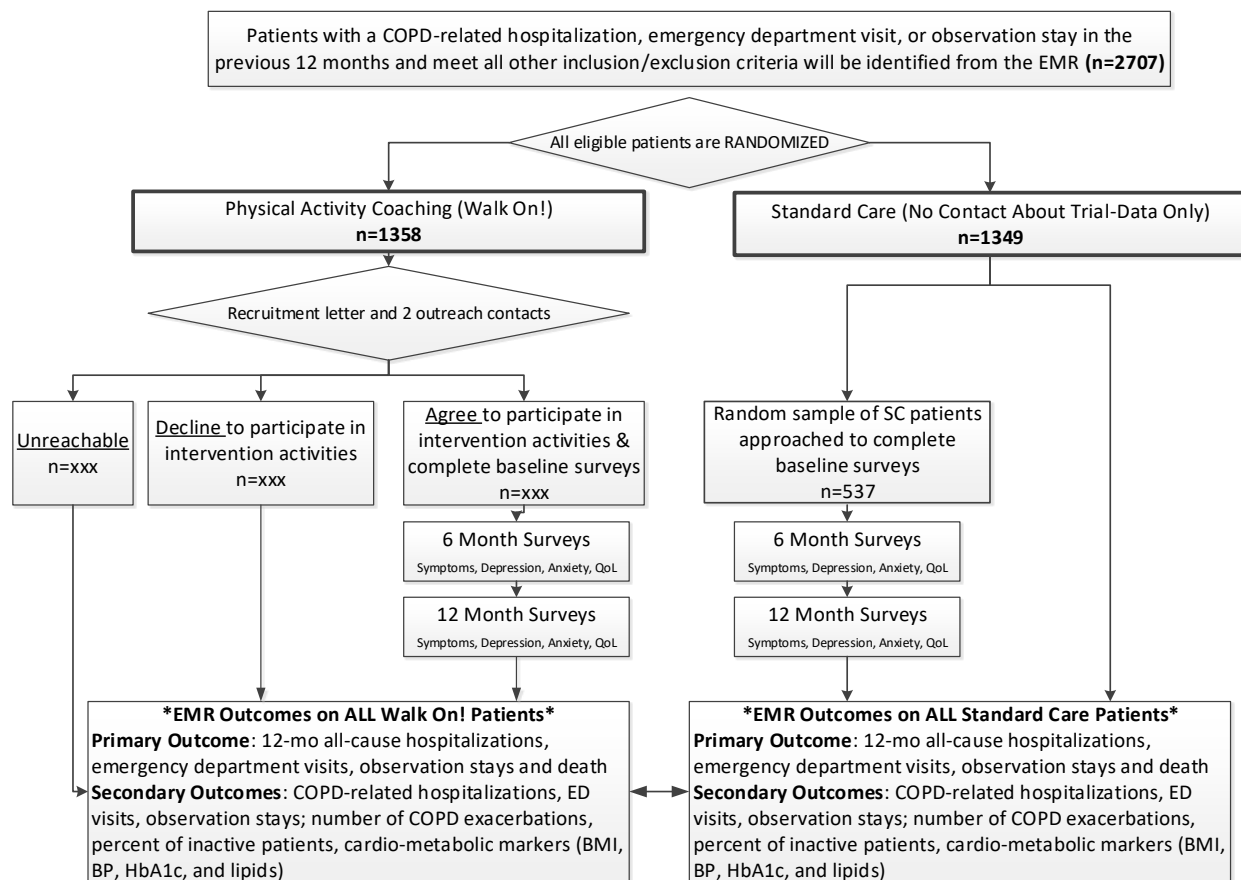

234  
235  
236 **Identifying Eligible Patients from the EMR**

237 Eligible patients from six KPSC medical service areas were identified, randomized and enrolled in this  
238 study from July 2015-July 2017. The target sample size of 1,650 was increased to 2,700 in July 2016 due  
239 to the lower than expected uptake rate.

240  
241 Inclusion criteria:

- 242 a) Patients with any COPD-related hospitalization, emergency department visit or observation stay in  
243 the previous 12 months are eligible for the study (June 1, 2014-present) from DO, OC, LAMC, RV, SD,  
244 and FO medical center areas (PARFU, previous utilization per MCA). Patients from WLA and SB who  
245 lived within 10 miles of DO and LAMC were sampled starting with Wave #10 to ensure we reached  
246 our new sample target.  
247



248 (Original up to 9/31/15) COPD-related hospital-based utilization are defined according to the  
 249 Centers for Medicare and Medicaid Services (CMS) and National Quality Forum (NQF) criteria for the  
 250 Hospital Readmission Reduction Program. The following principal discharge diagnoses of COPD will  
 251 be included (ICD-9 codes: 491.21, 491.22, 491.8, 491.9, 492.8, 493.20, 493.21, 493.22, and  
 252 496) or respiratory failure (ICD-9 codes: 518.81, 518.82, 518.84, 799.1) with a secondary diagnosis of  
 253 COPD exacerbation (ICD-9 codes: 491.21, 491.22, 493.21, 493.22)  
 254 Updated Effective 10/1/15: Any COPD-related hospitalization, emergency department visit or  
 255 observation stay in the previous 12 months with principal discharge diagnoses of COPD (J44.1, J44.0,  
 256 J41.8, J42, J43.1, J43.2, J43.8, J43.9, J44.9, J44.0, or J44.1) or principal diagnosis of respiratory failure  
 257 (J96.00, J96.01, J96.02, J96.90, J96.91, J96.92, J80, J96.20, J96.21, J96.22, or R09.2) and a secondary  
 258 diagnosis of acute exacerbation of COPD (J44.1 or J44.0)  
 259 Note: If patient has an external KP encounter, two COPD diagnosis codes are required separated by  
 260 2 days in order to be included to avoid miscoding which can occur frequently w/claims data.  
 261

| ICD-9 Codes (6/1/14-9/31/15)                       | ICD-10 Codes (10/1/15-Present)                                         |
|----------------------------------------------------|------------------------------------------------------------------------|
| <b>Principal discharge diagnosis</b>               |                                                                        |
| 491.21                                             | J44.1                                                                  |
| 491.22                                             | J44.0                                                                  |
| 491.8                                              | J41.8                                                                  |
| 491.9                                              | J42                                                                    |
| 492.8                                              | J43.1, J43.2, J43.8, J43.9                                             |
| 493.20                                             | J44.9                                                                  |
| 493.21                                             | J44.0                                                                  |
| 493.22                                             | J44.1                                                                  |
| 496                                                | J44.9                                                                  |
| 518.81+ either: 491.21, 491.22, 493.21, or 493.22  | J96.00, J96.01, J96.02, J96.90, J96.91, J96.92 + either J44.1 or J44.0 |
| 518.82 + either: 491.21, 491.22, 493.21, or 493.22 | J80 + either J44.1 or J44.0                                            |
| 518.84 + either: 491.21, 491.22, 493.21, or 493.22 | J96.20, J96.21, J96.22 + either J44.1 or J44.0                         |
| 799.1 + either: 491.21, 491.22, 493.21, or 493.22  | R09.2 + either J44.1 or J44.0                                          |

- 262 b) Age >40 years at the time of the hospitalization/ED visit/Ob stay  
 263 c) On at least a bronchodilator or steroid inhaler prior to the encounter or if not on an inhaler, had a  
 264 previous COPD diagnosis (any outpatient diagnosis is acceptable; inpatient diagnosis is acceptable  
 265 only if it is a KFH admission)  
 266 d) Continuous health plan membership in the 12 months prior to cohort identification.  
 267

268 Exclusion criteria:

- 269 a) For patients with spirometry data, FEV1/FVC ratio >0.70 at any point in the 24 months prior to  
 270 cohort identification; include FEV1/FVC pre-bronchodilator use if post value is unavailable  
 271 b) Discharged to hospice (look for hospice encounter in past 6 months up to cohort identification; add  
 272 home-based PC service as exclusion due to homebound status), a skilled nursing facility, long term-  
 273 care or another acute care hospital during the index admission. \*If patients are missing a discharge  
 274 status (this is most common with non-KP encounters), they are excluded.  
 275 c) Level of function at admission or discharge is bed bound during the index admission  
 276 d) Has Alzheimers disease/dementia or metastatic cancer

| ICD-9                                                                                            | ICD-10 (10/1/15-Present)                            |
|--------------------------------------------------------------------------------------------------|-----------------------------------------------------|
| <b>Dementia/Alzheimers</b>                                                                       |                                                     |
| 290, 290.10, 290.11, 290.12, 290.20, 290.21, 290.3, 290.40, 290.41, 290.42, 290.43, 290.8, 290.9 | F03.90, F05, F01.50, F01.51,                        |
| 294.10, 294.11, 294.20, 294.21                                                                   | F02.80, F02.81, F03.91                              |
| 331.0, 331.11, 331.19, 331.82, 331.83,                                                           | G30.0, G30.1, G30.8, G30.9, G31.01, G31.09, G31.83, |

|                                    |                                                                                                                                                                                      |
|------------------------------------|--------------------------------------------------------------------------------------------------------------------------------------------------------------------------------------|
|                                    | G31.84                                                                                                                                                                               |
| 780.93                             | R41.1, R41.2, R41.3                                                                                                                                                                  |
| <b>Metastatic/Advanced Cancers</b> |                                                                                                                                                                                      |
| 153.9                              | C18.9                                                                                                                                                                                |
| 162.9                              | C34.90, C34.91, C34.92                                                                                                                                                               |
| 174.9                              | C50.911, C50.912, C50.919                                                                                                                                                            |
| 183                                | C56.1, C56.2, C56.9, C57.00, C57.01, C57.02, C57.10, C57.11, C57.12, C57.3, C57.20, C57.21, C57.22, C57.4                                                                            |
| 196                                | C77.0, C77.1, C77.2, C77.3, C77.4, C77.5, C77.8, C77.9                                                                                                                               |
| 197                                | C78.00, C78.01, C78.02, C78.1, C78.2, C78.30, C78.39, C78.4, C78.5, C78.6, C78.7, C78.80, C78.89                                                                                     |
| 198                                | C79.00, C79.01, C79.02, C79.10, C79.11, C79.19, C79.2, C79.31, C79.32, C79.40, C79.49, C79.51, C79.52, C79.60, C79.61, C79.62, C79.70, C79.71, C79.72, C79.81, C79.82, C79.89, C79.9 |

- 277 e) Morbidly obese (BMI >40) at time of cohort identification  
278 f) Completed pulmonary rehabilitation in the 6 months prior to cohort identification (OVG150 visit  
279 code for internal PR; G0424, G0237, 97150, 97530, 97110 for claims data with duration of at least 30  
280 days between the first and last session for all claims)  
281 g) Deceased at cohort identification  
282 h) Dis-enrolled from the health plan at cohort identification  
283

## 284 Randomization

285 We considered and rejected the option of group- or cluster-level randomization. The core Walk  
286 On! components were applied at the level of the individual patient rather than the provider or clinic, so  
287 cross-over or spill-over of intervention effects within clinics or providers should not occur. Consequently,  
288 there was no scientific advantage to cluster-level randomization.  
289

290 All eligible patients were randomly assigned 1:1 to Walk On! or to continue with standard care,  
291 stratified by medical center, time from hospitalization/ED/Ob Stay (<6months vs. ≥ 6months), level of  
292 physical activity obtained from the exercise vital sign closest to the cohort identification date (inactive: 0  
293 min/week of moderate/vigorous physical activity, MVPA vs. active: at least 1 min/week of MVPA;  
294 patient will be assumed to be inactive if no EVS available), and median age (<72 vs. ≥72) by random  
295 permuted blocks to ensure balance and reduce bias. The randomization was pre-generated and included  
296 two steps for each stratum. First, the block size was randomly selected among a set of pre-selected  
297 block. Second, within each block randomly selected, the overall number of treatment assignments was  
298 balanced between groups, but the order of treatment assignment was randomly assigned. We repeated  
299 this process until the number of maximum expected patients was reached. We reviewed every 6 months  
300 to determine balance across the two groups on these characteristics and did not make any modifications  
301 to the scheme.  
302

303 For standard care patients (n=250; revised to n=537 due to a lower than expected response  
304 rate) who were approached to complete surveys, with each recruitment wave, we randomly selected  
305 patients from the six sites proportional to the number of patients randomized to Walk On! We sent  
306 surveys to all SC patients on the final wave due to the low response rate from the earlier waves.  
307

308 The anchor date for all patients is the date they are identified and randomized to treatment  
309 arms. For example, a patient had a COPD admission/ED/Obs encounter on June 25, 2014 and is  
310 identified for the study on June 30, 2015, the anchor date would be June 30, 2015. The 12-month pre-

311 intervention period would include the index encounter (June 25, 2014 to June 30, 2015) and the post-  
312 intervention period would be July 1, 2015 to June 30, 2016.

313

### 314 **Consent and Passive Monitoring**

315 Following a single consent design,<sup>36,37</sup> only those assigned to Walk On! were asked to consent to  
316 intervention activities. Patients assigned to standard care were not contacted about the study. Our IRB  
317 considered passive monitoring of outcomes using existing EMR data a minimal risk activity that did not  
318 require patient consent. We believe that such an approach is both scientifically necessary and ethically  
319 justified. Acceptability of Walk On! to patients and level of participation are essential components of  
320 real-world effectiveness. If we limited trial enrollment to those who volunteer to receive Walk On!,  
321 findings regarding intervention acceptability or adherence may have limited scientific value. Moreover,  
322 we believed the subset of patients who agree to be in an RCT is substantially different from the subset  
323 of patients who would agree to do Walk On! if offered it; findings regarding intervention effects on the  
324 primary outcome would have questionable validity and limited generalizability.

325

### 326 **Standard Care (SC) Control**

327 Standard care patients continued to receive their routine care from KPSC and had access to all  
328 health services, e.g. primary, specialty care, pulmonary rehabilitation, health education and lifestyle  
329 programs in accordance with their health plan. Standard care patients received no instructions to  
330 exercise and were not contacted about the trial, with the exception of a randomly selected subgroup  
331 (n=250, revised to 537) with each recruitment wave to complete PROs at 6 and 12 months (with  
332 exception of satisfaction surveys) for comparison to the Walk On! patients.

333

### 334 **Rationale for Standard Care as a Comparator**

335 We chose to compare the Walk On! intervention to standard of care for the following reasons:  
336 1) there were insufficient data from large scale studies to support any specific PA intervention model for  
337 COPD and most small efficacy studies have had restrictive inclusion criteria; and 2) since there are no  
338 scalable programs available, standard care (which includes access to pulmonary rehabilitation) was the  
339 most appropriate comparator from the perspective of the healthcare system that is considering  
340 implementing the intervention and the individual patient who is considering participating in the  
341 intervention. We considered an active control group with mail outreach to remind members of the  
342 programs available to them. However, this would not increase the scientific value of the study, given  
343 that such low intensity touches are historically known to be ineffective.

344

### 345 **Study Procedures**

346 For those patients randomized to Walk On!, a recruitment packet that included a letter signed  
347 by the principal investigator and the pulmonary physician in charge for the medical service area, a study  
348 brochure describing the Walk On! program, and a 3-min DVD video “testimonial”  
349 (<http://abc7.com/archive/9501102/>) about the importance of PA by one of the Patient Advisory Board  
350 (PAB) members was mailed within 1-6 business days of cohort selection and randomization. (Note: We  
351 stopped mailing the DVD after wave 4 due to patient and coaches’ feedback that they were not being  
352 watched. Uptake of Walk On! was not negatively impacted by eliminating the DVD from our recruitment  
353 packet.) Patients had the option of calling the physical activity coach to either agree to participate, or to  
354 opt-out in response to the mailing. If patients did not actively call the PA coach for more information or  
355 to opt-in to the study, the coaches conducted a total of two outreach contacts via phone and/or secure  
356 message seven business days after the mailing. When contact was made with the patient, the coach  
357 described the purpose of the study, how the patient was selected for participation, the Walk On!

358 intervention, and time commitment. After addressing the patient’s questions, the coach obtained oral  
359 consent and scheduled the baseline orientation intake visit. Patients did not have any further contact to  
360 recruit them once the recruitment packet was sent and two contact attempts were made.

361 Patients who agreed to participate in Walk On! activities were sent a baseline packet  
362 approximately ten days before their scheduled baseline visit that included: 1) a consent form, 2) an  
363 activity sensor, 3) an additional copy of the study brochure, and 4) surveys to assess their physical  
364 activity, symptom burden (COPD Assessment Test, CAT), depression (PHQ-8), and anxiety (GAD-7), and  
365 quality of life (PROMIS-10). Patients were asked to wear one of two available sensors for up to seven  
366 days prior to the baseline visit. After the visit, patients received four weekly coaching phone calls.  
367 Outreach by the PA coaches for the remaining 11 months were individualized and targeted based on  
368 patients’ progress with their walking program. Patients were also encouraged to attend monthly peer  
369 support meetings.

370 At six and 12 months after their randomization date, patients were sent a survey packet and a  
371 \$5 gift card. A reminder letter was sent if the surveys are not received within two weeks. Finally, a  
372 phone follow-up was made seven business days after the reminder letter. Patients had the option of  
373 providing their survey responses over the phone.

374 For standard care patients, a random sample (n=250, revised to 537) was invited to complete  
375 the same set of surveys at baseline, six and 12 months, with the exception of the satisfaction questions,  
376 in order to compare changes in PROs between intervention and standard care patients. These patients  
377 were only informed that their medical center is participating in a study to improve outcomes for  
378 members with COPD. We used the same mailing and phone-based follow up procedures described  
379 above.

## 380 **Walk On! Physical Activity Coaching Intervention**

### 381 ***Theoretical Foundations***

382 The Walk On! intervention was designed based on learnings from a series of collective  
383 studies<sup>45,47,48,85</sup> by the investigative team that were informed by early and deep engagement with  
384 patient stakeholders and is grounded in social cognitive<sup>38</sup> and self-regulation theories<sup>39,40</sup> and core  
385 principles of motivational interviewing (Table 2).<sup>41</sup> In self-efficacy theory, the impetus for change resides  
386 in the individual’s efficacy expectations or one’s “confidence in one’s ability to take and persist in  
387 action.” These expectations reflect a person’s beliefs about how capable he or she is in performing a  
388 task. External environmental supports, like professional, peer and family modeling and engagement in  
389 similar behaviors also increases efficacy. Walk On! had three core components (baseline  
390 assessment/orientation, intensive coaching, and pro-active support) with built in flexibility to  
391 accommodate the diverse preferences and needs of patients as well as anticipated implementation  
392 constraints. We focused on promoting walking as the primary mode of PA since nearly 90% of activities  
393 that patients with COPD engage in are ambulatory in nature and it is a safe and accessible form of PA.<sup>42</sup>  
394 The estimated time commitment ranged from 6-18 hours over the course of 12 months depending on  
395 patients’ participation in various Walk On! activities.

396

**Table 2. Walk On! Intervention Mapping**

| Target Concept (Source)                                                                                                                           | Walk On! Strategy                                                                                                                                                                                                                                                                                                                                                                                                                                                                                                                                          |
|---------------------------------------------------------------------------------------------------------------------------------------------------|------------------------------------------------------------------------------------------------------------------------------------------------------------------------------------------------------------------------------------------------------------------------------------------------------------------------------------------------------------------------------------------------------------------------------------------------------------------------------------------------------------------------------------------------------------|
| Enhancing self-efficacy for increasing physical activity                                                                                          |                                                                                                                                                                                                                                                                                                                                                                                                                                                                                                                                                            |
| <ul style="list-style-type: none"> <li>• Performance or enactive accomplishments</li> <li>• Re-interpretation of signs and symptoms</li> </ul>    | <p>Guiding patients to set achievable walking goals each week to increase their mastery of walking gradually</p> <p>Practicing breathing strategies to cope with dyspnea during walking, and, over time, developing a recognition that one can do more with the same level of dyspnea (desensitization to dyspnea)</p> <p>Tracking and reporting symptoms every week increased awareness of changes in symptoms that might interfere with walking and daily activities to facilitate earlier treatment and reduce disease-specific barriers to walking</p> |
| <ul style="list-style-type: none"> <li>• Vicarious experience</li> </ul>                                                                          | <p>Social modeling allowed patients to be positively influenced by the achievement of other participants initially during the orientation session and during the ongoing monthly group meetings</p>                                                                                                                                                                                                                                                                                                                                                        |
| <ul style="list-style-type: none"> <li>• Social persuasion</li> </ul>                                                                             | <p>Encouragement from coaches and peers during orientation session; ongoing reinforcement from coaches via phone/secure messaging; and peer interactions during monthly meetings</p>                                                                                                                                                                                                                                                                                                                                                                       |
| Exercise specific social support                                                                                                                  | <p>Identification of family or friends to support efforts at increasing physical activity, including attendance at Walk On! activities</p> <p>Peer support and networking during monthly group meetings that include enactment of walking/light exercise</p>                                                                                                                                                                                                                                                                                               |
| Iterative rational behavior change                                                                                                                |                                                                                                                                                                                                                                                                                                                                                                                                                                                                                                                                                            |
| <ul style="list-style-type: none"> <li>• Accurate self-monitoring</li> <li>• Incremental goal setting</li> <li>• Motivational feedback</li> </ul> | <p>Study-issued step counting devices allowed patients to track their daily progress accurately</p> <p>Dynamic individualized incremental goals suggested by the IVR and Internet-based intervention platforms</p> <p>Patients received real-time feedback from the step counting devices and personalized motivational feedback and guidance as needed from the coaches</p>                                                                                                                                                                               |

397

**398 Walk On! Intervention Components**

399 **A. In-person individual or group orientation visit (Week 0)** Patients had the option of attending the  
400 orientation session individually or with one other patient who lived within a close geographical area to  
401 promote peer bonding and support. Since social support<sup>43</sup> has been shown to be critical for behavior  
402 change, patients were also encouraged to identify and invite a family or friend care partner to this visit.

403

404 *1) Education and skills training on PA & COPD management.* During the visit, the coach discussed the  
405 importance of PA for COPD self-care, what patients hoped to achieve with increasing PA, how to  
406 manage their symptoms with PA, maintaining safety with PA, and strategies to overcome personal  
407 barriers to regular PA. Patients were provided a paper copy of the Walk On! Patient Guide (Appendix  
408 Section 2).<sup>30</sup>

409

410 *2) Baseline functional assessment for PA prescription.* Patients completed a six-minute walk test  
411 (6MWT) while wearing their activity sensor and had their oxygen saturation and heart rate measured  
412 pre- and post- test. Patients who desaturated <88% at the end of the 6MWT were evaluated for  
413 supplemental oxygen prior to starting their PA program. The coach (see detailed description below)  
414 tailored the initial walking prescription according to patients' performance on the 6MWT and their  
415 average steps/day during the baseline 7-day monitoring period; they used the higher of the two step  
416 counts as an initial step goal. Our previous data showed that patients typically perform at approximately  
417 60% of the walking intensity achieved during the 6MWT.<sup>44</sup> Thus, we derived a step count goal of total  
418 steps accrued during the 6MWT multiplied by a factor of 5 to achieve approximately 30 minutes of

419 walking per day. For instance, a patient who accrued 500 steps during the 6MWT might be asked to aim  
420 for 1500 steps/day during week one ( $500 \times 5 \times 0.60 = 1500$  steps/day). For patients who were more frail  
421 and for whom walking would initially be difficult due to severe deconditioning, we loaned a portable  
422 cycle ergometer for patients to use during the first four weeks to strengthen their walking muscles and  
423 gradually progressed them to a walking program.

424  
425 *3) Training on use of activity sensors & resistance bands.* Patients chose one of two devices to monitor  
426 their step counts, the Omron HJ329 pedometer or Tractivity accelerometer based on their preference  
427 and access to the Internet, and were trained on their proper use. The Omron has an on-device display  
428 whereas the Tractivity device displays step count data via any Internet or Blue-tooth enabled device.  
429 Patients who did not have Internet access or were Spanish speakers were encouraged to use the Omron  
430 pedometer since they would be able to see their step counts more easily and could report their average  
431 weekly step counts to our automated telephone interactive voice response (IVR) system (Spanish script),  
432 respectively. The Omron pedometer was worn on the waist and had been validated and used in several  
433 of our COPD studies.<sup>30,45</sup> (Appendix Section 2 )

434  
435 The Tractivity, worn on the ankle, was validated against a research grade accelerometer in a general  
436 population of hospitalized medical-surgical patients ( $n=20$ )<sup>46</sup> and used by patients in our pilot with  
437 acceptable concordance with a research grade accelerometer (Stepwatch). Patients who chose to use  
438 Tractivity were shown how to download a small applet on their Internet-enabled device and how to  
439 view their step counts. (Appendix Section 2)

440  
441 Note: The vendor that provided the Tractivity sensors went out of business in December 2016. We were  
442 only able to offer patients the Omron device with recruitment waves 10 and 11 while we worked on  
443 evaluating alternative devices, selecting and testing our top selection and configuring and testing our  
444 systems to accommodate a new device for the final wave. We were able to offer patients the option of  
445 using a wrist-worn, FitBit Alta or an Omron device for wave 12. We also converted patients from the  
446 earlier waves who had challenges with using their Omron device to the FitBit if their coaches felt that  
447 having the FitBit device help with engagement and motivation. (Appendix Section 2)

448  
449 Since breathlessness with daily activities that involve the upper extremities is common in this  
450 population, patients were also instructed on arm exercises using study-issued resistance bands to  
451 strengthen their upper extremities. They were asked to complete these arm exercises 3 times/week,  
452 but these exercises were not closely tracked.

453  
454 ***B. Intensive coaching (Weeks 1-4).*** We have found that the initial weeks of starting a walking program  
455 are most critical and are a time when patients require significant support to solve problems and barriers  
456 that arise as they integrate a new activity in their daily lives. Thus, the coach conducted weekly phone  
457 calls to help patients progress with their PA goals, reinforce COPD self-care skills, support patients'  
458 efforts to monitor their activities and symptoms, assist with problem solving PA barriers, and  
459 troubleshoot any device or technology issues. The coaches were guided by key principles of  
460 motivational interviewing such as expressing empathy, rolling with resistance, and supporting self-  
461 efficacy<sup>41</sup> to personalize the content of these calls according to the patients' progress. The coaches  
462 made appropriate referrals to either the patient's primary care provider or pulmonologist regarding any  
463 clinical issues that needed to be followed up on. Patients were closely guided on how to safely resume  
464 their PA after experiencing a COPD exacerbation. In addition, participants were instructed during the  
465 baseline orientation to know when to stop their PA and seek emergent care (e.g. significant increases in  
466 their dyspnea, chest pain or tightness, or other severe pain associated with activity).

467 **C. Proactive follow-up and support (Weeks 5-52).** Development of a new habit such as PA requires  
468 regular practice, collaborative monitoring, and ongoing reinforcement and support from credible peer  
469 models. Regardless of which activity sensor patients used, both systems were designed to support  
470 dynamic, timely feedback, and individualized, iterative goal setting.

471  
472 *1) Proactive monitoring and follow up.* Patients who used the Omron received an automated IVR phone  
473 call each week that queried them about their breathing, presence of any health issue(s) that interfered  
474 with their PA, and their average step count in the past week. Based on the patients' responses, a step  
475 goal was suggested for the subsequent week. These calls lasted, at most, 3 minutes. We recognized  
476 from our previous studies and feedback from our PAB that not all patients would agree to wear a  
477 pedometer to track their step counts; thus, we built into our IVR system an option for patients to enter  
478 the frequency and duration of their PA. The IVR system provided recommendations for PA duration  
479 instead of steps in these situations.

480  
481 Patients who used the Tractivity device transmitted their data to an Internet-enabled device  
482 (smartphone, tablet or laptop) via Bluetooth and responded to the same two questions about their  
483 breathing and health status as asked of Omron users, which generated the step goal recommendation  
484 for the subsequent week. Patients were encouraged to review the graphical summary of their step  
485 counts, which displayed past step data and suggested step goals.

486  
487 The personalized step goal algorithm (Figure 4) was designed to ensure that the step progression was  
488 safe and minimized common adverse events such as increased muscle soreness, more dyspnea and  
489 fatigue associated with increasing PA. Email alerts were generated to the coaches when patients  
490 reported worsening breathing and health problems interfering with their PA.

491  
492 Patients who used the FitBit Alta are not asked the weekly health and breathing questions due to our  
493 inability to deploy these questions within the FitBit web application nor were we able automatically  
494 generate suggested step goals based on their previous week's performance and survey responses.  
495 However, patients have access to all the various tracking functionalities available on the FitBit website to  
496 use at their discretion.

497

Figure 3. Walk On! Program

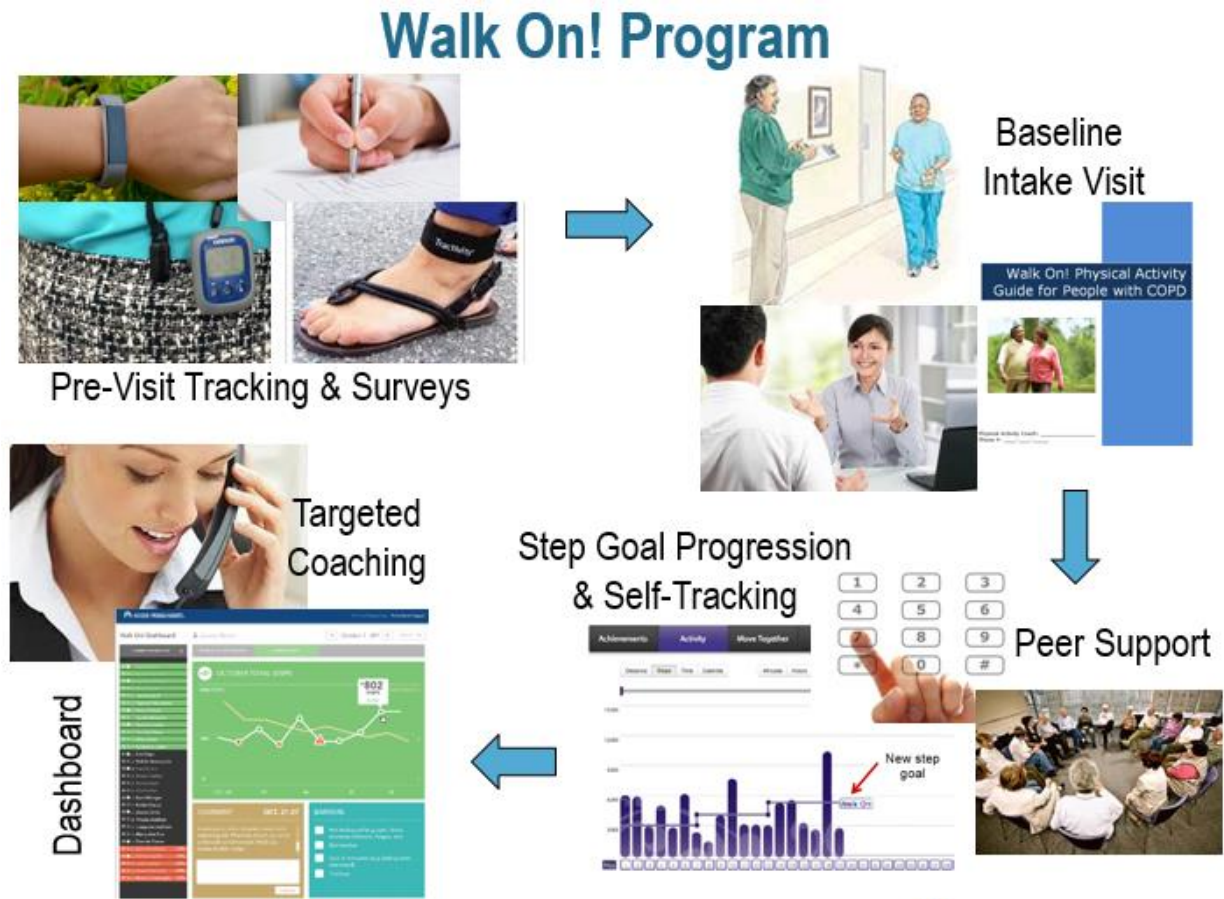

498  
499



500 Figure 4. Step Goal Algorithm

Walk On! Step Goal Algorithm: IVR System

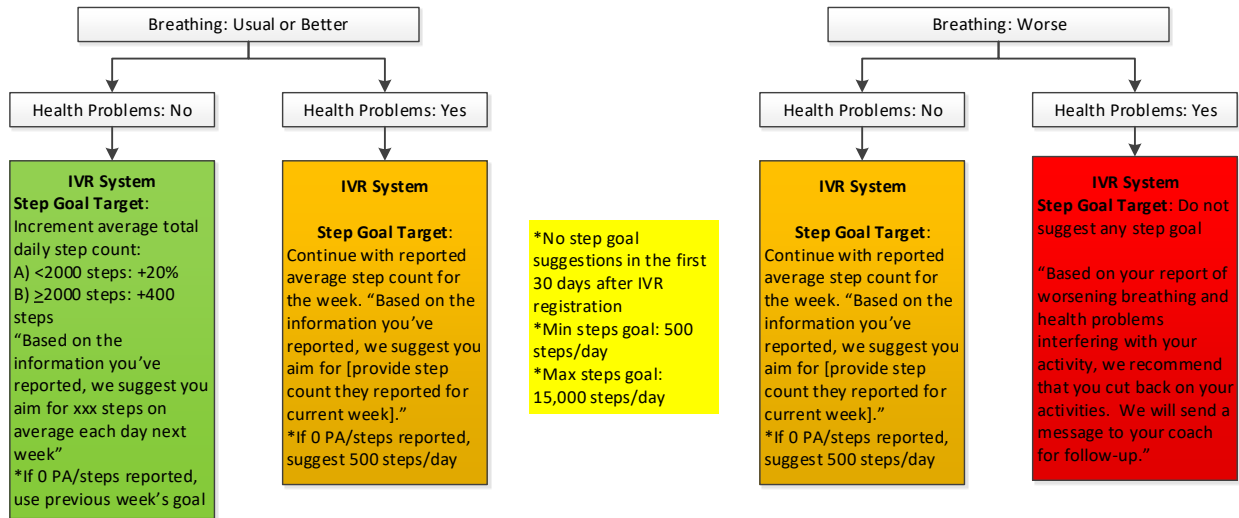

If patient reports no steps but reports minutes of activity, use the following algorithm

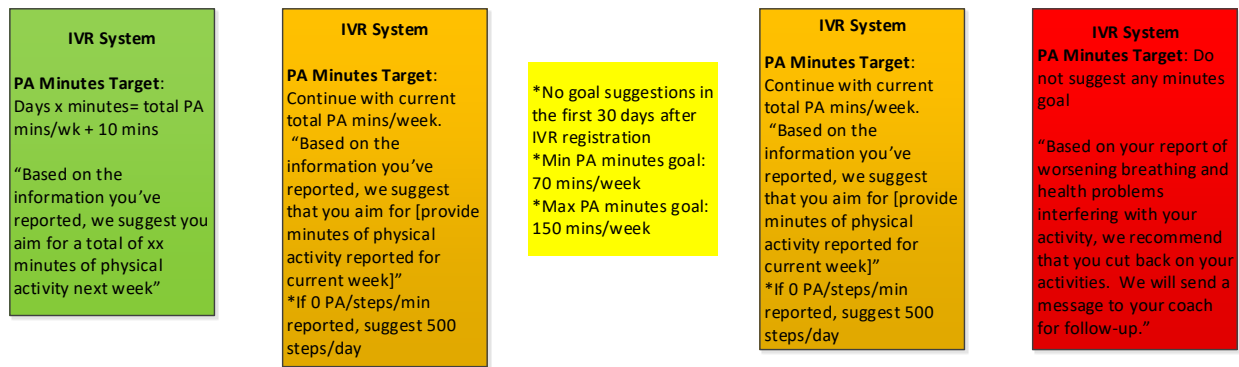

501

Walk On! Step Goal Algorithm: Tractivity System

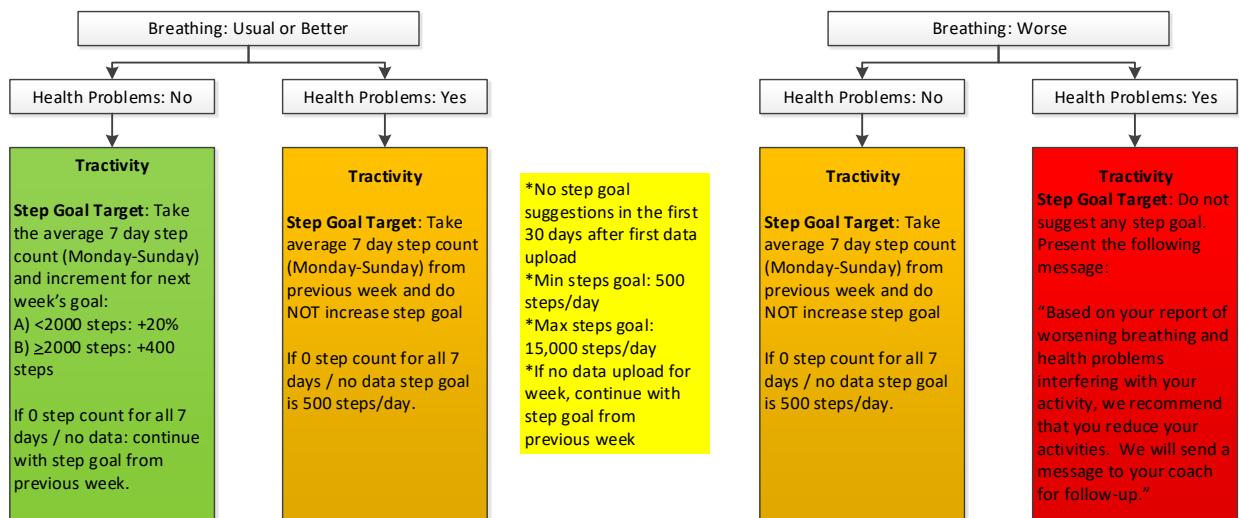

502  
503

504 Data from both the IVR system and Tractivity web site were automatically retrieved and displayed on a  
505 dashboard for regular review by the coaches (Figure 4). The dashboard facilitated population  
506 management and targeted phone/secure message outreach to patients who were struggling to progress  
507 with their walking goals and/or had more severe symptoms than usual, in which case the coach  
508 communicated with the patient's provider as needed. The dashboard facilitated contact and workflow  
509 management, standardized documentation to track intervention exposure and thus increased the  
510 efficiency of the quality control/process evaluation efforts.

511  
512 *2) Monthly group visits for psychosocial support from peers, skill-building, and problem solving.* Patients  
513 had the option of attending monthly hour-long support sessions with their family member or friend.  
514 These group visits started with 15-minutes of light exercise followed by 15-minutes of informal peer  
515 interactions and networking. Peer support is especially important for patients who feel they have  
516 limited support from their families. The meetings concluded with a 25-minute didactic/skill-building  
517 component that was broadcasted via the web and tele-conference.

518  
519 The session topics focused on practical strategies to overcome common barriers to staying active, e.g.  
520 COPD exacerbations, weather, motivation and other relevant topics related to COPD management. The  
521 coaches collaborated in creating power point slides for these topics and collectively reviewed and  
522 approved the content for 12 topics. Other slide sets were developed on new topics that were either  
523 suggested by patients or nominated by the coaches.

524  
525 Our PAB members participated in these sessions as their time allowed and, along with other peers,  
526 shared their successes with using community-based resources to stay active. Patients were entered into  
527 a raffle for a \$20 gift card at each monthly meeting. Sites that have an active pulmonary rehabilitation  
528 program were encouraged to combine the Walk On group education visits with the rehabilitation  
529 education sessions to increase sustainability and efficiency in early to mid-2017. Two sites were  
530 successful in doing this mostly because they did not have a physical space constraint.

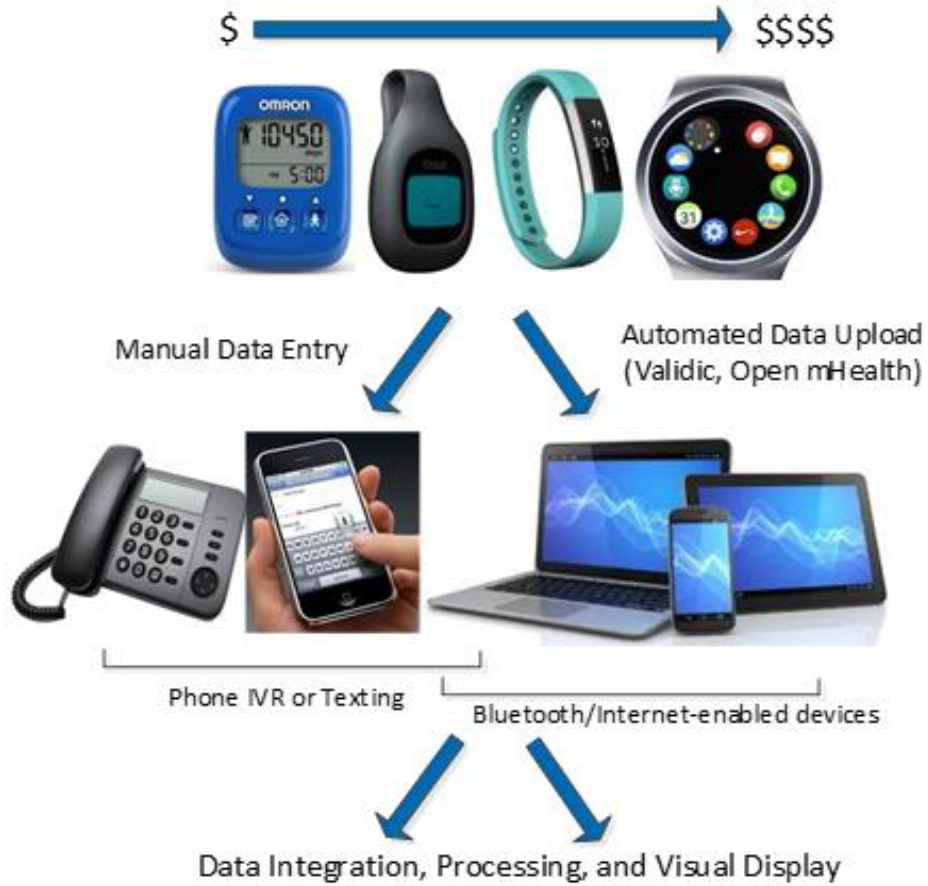

531  
532

Figure 4. Coaches Dashboard (Note: Patient names are fictitious)

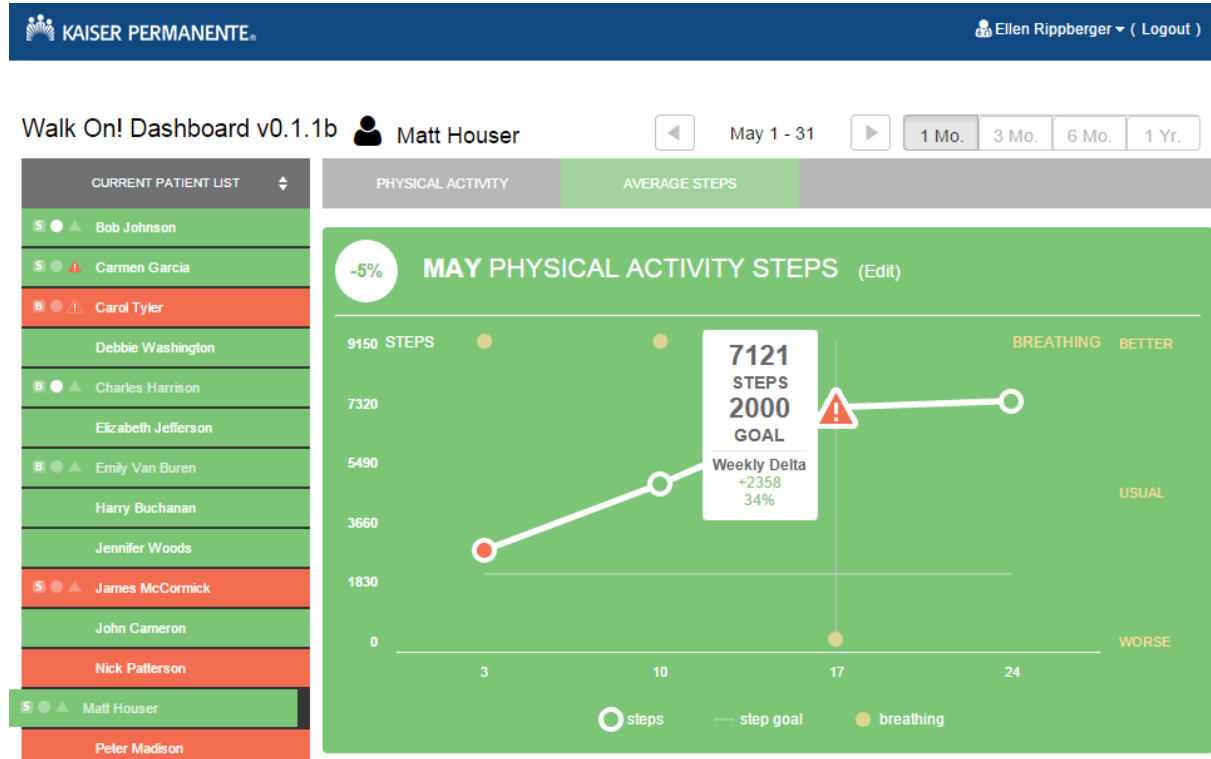

PLANNED TELEPHONE FOLLOW-UP

May. 4 - 10

1. Can you tell me how you feel you did with this goal? Met Goal?  Yes  No

2. What thing(s) helped?  
What helped?

3. What barriers got in the way?  
 Too Ill  Too Busy  Bad Weather  Motivation  
 No exercise partner  Technical issues  Step goal too high  No Issues

4. What step goal would you like to set for next week? Steps a day

5. Your plan to achieve next week's step goal:  
What/Where?  
When / How often / How Long?

GENERAL COMMENT(S)

May. 4 - 10

No Comments

533

534 **Walk On! physical activity coach training**

535 Walk On! coaches were recruited from the existing KPSC workforce of respiratory therapists,  
536 pulmonary rehabilitation coordinators, and pulmonary care managers. The coaches participated in a  
537 general motivational training workshop offered to all health care providers in our system and a half day  
538 in-person project-specific training during the 6-month pilot phase prior to the study launch. The  
539 coaches were also provided a detailed guide of the Walk On! program. Each coach implemented the  
540 Walk On! protocol with 1-4 pilot patients for 3 months in preparation for the trial; the principal  
541 investigator (HQN) or one of the lead PA coaches observed and provided feedback to the coaches during  
542 their first 1-2 baseline visits. Issues or concerns with the phone coaching calls were discussed during  
543 weekly to bi-weekly web conferences. This quality control structure continued throughout the 36-month  
544 intervention period.

545

546 **Intervention uptake and fidelity**

547 Given the pragmatic design where all eligible patients were automatically randomized to  
548 treatment arms, we closely tracked refusal rates and reasons for patients assigned to the Walk On!  
549 intervention. For participants who agreed to actively participate in Walk On!, we used the study  
550 dashboard to track uptake of the intervention components. Mild COPD exacerbations that are managed  
551 on an outpatient basis and hospitalizations/ED visits/observation stays for moderate to severe  
552 exacerbations are common in this cohort and were expected to be a major barrier to sustained PA and  
553 participation in intervention activities. Temporary suspension of intervention activities as requested by  
554 the patient or initiated by the coach due to COPD exacerbations or other acute illness as well as active  
555 withdrawals were documented. In order to balance the pragmatic nature of the study, we instituted a  
556 low intensity intervention fidelity assurance plan to include observations of up to five baseline intake  
557 visits and reviewing up to 5% of the planned and as needed telephone coaching contacts across each  
558 site.

559 **Measures and Outcomes**

560

561 **Descriptive Variables**

562 *Socio-demographic variables:* Age, gender, marital status, education and income (census-based),  
 563 race/ethnicity, and insurance status will be obtained from membership files

564 *Medications:* Pulmonary medications will be obtained from pharmacy databases. Supplemental oxygen  
 565 use will be obtained from durable medical equipment files. Long-term oxygen use is defined as the  
 566 patient being on oxygen >90 days, allowing a gap of no more than 14 days in the 12 months prior to  
 567 cohort identification.

568 *Co-morbidities:* All available diagnoses from outpatient and inpatient encounters in the 12 months prior  
 569 to cohort identification will be used to calculate the Charlson co-morbidity index

570 *Injurious Falls (DSMB Report):* The following E codes were used prior to 10/1/15: E880-E888. After  
 571 10/1/15, the following codes were used: W00-W19

572

573 **Primary Outcome**

574 The primary composite outcome is all-cause hospitalizations, emergency department (ED) visits,  
 575 observational stays, and mortality in the 12 months following randomization. Given the multiple  
 576 morbidities that patients with advanced COPD have and the known benefits of PA for these other  
 577 chronic conditions, it is reasonable to expect that Walk On! will have positive effects on hospitalizations,  
 578 ED visits, and observation stays for multiple causes. Walk On! is not expected to have its peak effects  
 579 until at least 6 months into the program and thus, follow-up of at least 12 months is needed for all  
 580 patients; and for those enrolled earlier, follow-up of up to 3 years will be available for secondary  
 581 analyses of long term adherence and effectiveness.  
 582

| <b>Table 3. Walk On! Data Collection Scheme</b>                            |                      |                 |                 |                  |
|----------------------------------------------------------------------------|----------------------|-----------------|-----------------|------------------|
|                                                                            | <b>Pre-12 Months</b> | <b>Baseline</b> | <b>6 Months</b> | <b>12 Months</b> |
| <b>Primary Composite Outcome</b>                                           |                      |                 |                 |                  |
| All-cause hospitalization                                                  | X                    |                 |                 | x                |
| All-cause emergency department visits                                      | X                    |                 |                 | x                |
| All-cause observation stays                                                | X                    |                 |                 | x                |
| All-cause mortality                                                        |                      |                 |                 | x                |
| <b>Secondary Outcomes</b>                                                  |                      |                 |                 |                  |
| COPD-related hospitalizations, ED visits, observation stays, exacerbations | X                    |                 |                 | x                |
| Cardio-metabolic indicators (BMI, HbA1c, BP, and lipids)                   | X                    |                 |                 | x                |
| <i>Patient-Reported Outcomes</i>                                           |                      |                 |                 |                  |
| Self-reported physical activity (exercise vital sign)                      | x                    | x               | x               | x                |
| COPD Assessment Test                                                       |                      | x               | x               | x                |
| PROMIS-10 Quality of Life                                                  |                      | x               | x               | x                |
| Personal Health Questionnaire, PHQ-9                                       |                      | x               | x               | x                |
| Generalized Anxiety Disorder, GAD-7                                        |                      | x               | x               | x                |
| Perception of Support for Exercise                                         |                      |                 | x               | x                |
| Satisfaction with Walk On!                                                 |                      |                 | x               | x                |

583

584

585 **Secondary outcomes**

586 *COPD-related hospitalizations, ED visits, and observation stays* will be defined according to the current  
 587 CMS criteria as detailed above in the description of the inclusion criteria.

*COPD exacerbations* will be ascertained via pharmacy records and utilization data. Mild to moderate exacerbations of COPD are typically characterized by changes in the current therapy to include increased use of bronchodilators, a short course of prednisone and/or antibiotics.<sup>47,48</sup> Our operational definition of an outpatient treated AECOPD included an in-person or virtual encounter (phone, email, or message) with or without a diagnosis of COPD (491.1, 491.21, 491.22, 491.9, 492, 492.8, 493.2, 493.22, and 496) documented with that encounter and accompanied by a prescription fill of either an oral steroid, ATB, or steroid and ATB within 2 days of the encounter.

| ICD-9  | ICD-10                  |
|--------|-------------------------|
| 491.1  | J41.1                   |
| 491.21 | J44.1                   |
| 491.22 | J44.0                   |
| 491.9  | J42                     |
| 492    | J43.1,J43.2,J43.8,J43.9 |
| 492.8  | J43.1,J43.2,J43.8,J43.9 |
| 493.2  | J44.0,J44.1,J44.9       |
| 493.22 | J44.1                   |
| 496    | J44.9                   |

588  
 589 A random sample of 185 probable AECOPD events were selected (n=15 records per strata) for chart  
 590 review by two physicians; disagreements were adjudicated by HQN. Inter-rater reliability was assessed  
 591 with a random 15% of the sample. Agreement between the two reviewers was excellent (kappa=0.93).  
 592 Approximately 80% of the virtual encounters had a missing diagnosis code compared to 13% of the in-  
 593 person clinic encounters. Restricting to only encounters that have a documented COPD diagnosis would  
 594 fail to capture a large number of AECOPD events (sensitivity: 38%, specificity: 94%). The most optimal  
 595 AECOPD definition which we propose to use included (1) encounters with a documented COPD diagnosis  
 596 followed by a prescription fill of ATB, steroids, or ATB and steroids and (2) encounters with no  
 597 documented COPD diagnosis but followed by a prescription fill of ATB and steroids (sensitivity: 67%,  
 598 specificity: 84%)

599  
 600 *Physical Activity.* Every patient is asked two questions that capture their regular physical activity  
 601 (exercise vital sign, EVS) during the intake process for all outpatient visits: 1) “On average, how many  
 602 days per week do you engage in moderate to strenuous (vigorous) exercise (like a brisk walk)?” and 2)  
 603 “On average, how many minutes do you engage in exercise at this level?” These questions are typically  
 604 asked by front office staff, and patients’ responses are entered into the EMR. Response choices for days  
 605 are categorical (0–7). Minutes are recorded as: 0, 10, 20, 30, 40, 50, 60, 90, 120, and 150 minutes or  
 606 greater. The EMR system software then multiplies the two self-reported responses to display total  
 607 minutes per week of moderate or vigorous physical activity (MVPA) for the health care provider to  
 608 review. Due to the highly skewed MVPA data, we will categorize patients as being completely inactive (0  
 609 mins/week), insufficiently active (1-149 mins/week) or active, meeting national physical activity  
 610 recommendations ( $\geq 150$  mins/week). Patients with COPD in our health system have on average of 16  
 611 ambulatory visits over a year with approximately, 50% of those visits having usable EVS data. We will  
 612 use all available EVS data to classify patients into their usual pattern of PA based on the modal/median  
 613 EVS values. If a mode exists (most common category), then mode exercise category was used. If two  
 614 exercise categories were equally the most common, then the higher category was recorded (unless  
 615 categories are 0 and  $>150$  min/wk then 1-150 min/wk category was used). The EVS has evidence of  
 616 construct and predictive validity.<sup>11,49,50</sup>

617  
 618 *Cardio-metabolic Markers* include body mass index, systolic blood pressure, diastolic blood pressure,  
 619 HbA1C, low density lipoprotein, high density lipoprotein, triglycerides, and total cholesterol. All

620 measurements available in the 12 months prior to identification will be averaged and used as baseline  
621 values.  
622  
623 For follow-up assessments of systolic and diastolic blood pressure, we will use the average of all routine  
624 clinic blood pressure readings taken between 6 and 12-months post-randomization. Blood pressures  
625 obtained with temperatures of  $\geq 100^{\circ}\text{F}$  and those obtained in urgent care are excluded.  
626  
627 For the others, we will use the measure that is closest to the 12-month post-study enrollment date.  
628 Based on KPSC clinical care practices and our prior research experiences, we expect to have close to  
629 complete information on BMI and blood pressure for all patients; we should have near complete data on  
630 HbA1c for the approximately 35% of patients with co-morbid diabetes.  
631  
632 *Patient Reported Outcomes (PROs) (Appendix Section 2)*  
633  
634 *Health-Related Quality of life (HRQL).* Increased PA is expected to positively affect COPD and other co-  
635 morbid illnesses and consequently, improve patients' physical and mental health. The PROMIS-10 Global  
636 Quality of Life is used to measure HRQL.  
637  
638 *Symptoms.* COPD specific symptoms are measured with the COPD Assessment Test (CAT). Depression  
639 and anxiety which are common in COPD are assessed with the Personal Health Questionnaire, PHQ-9  
640 and General Anxiety Disorder, GAD-7 survey. Note: The suicide ideation question of the PHQ-9 was  
641 removed after the second recruitment wave based on feedback from patients who felt the question was  
642 tangential to a program on physical activity. All study participants are referred to a depression care  
643 manager (if they agree) if they score 10 points or higher on the PHQ-8.  
644  
645 *Health behavior.* Physical activity, sedentary time, and sleep are measured using five questions modeled  
646 from national health surveys.  
647  
648 *Perception of support for PA* is measured with three questions which have been used our previous  
649 studies ask patients regarding the amount of support they receive for their physical activity from their  
650 coach, family members/friends, and health care provider.  
651  
652 *Satisfaction.* Overall satisfaction with Walk On! and its components including the baseline orientation,  
653 intensive follow-up in the first 4 weeks, pro-active monitoring, step goal setting using the IVR and  
654 Tractivity tools, reinforcement from the coach, and peer support will be measured at 6 and 12 months.  
655 We are also conducting semi-structured exit interviews with a randomly selected 25% of the Walk On!  
656 participants (or until thematic saturation) to understand the personal and ecological barriers and  
657 facilitators to successful uptake of Walk On!  
658

| <b>Table 4. Walk On! Data Summary</b>                                              |                                       |
|------------------------------------------------------------------------------------|---------------------------------------|
|                                                                                    | <b>Source</b>                         |
| <b>Primary Composite Outcome</b>                                                   |                                       |
| All cause death-hospitalizations-observation stays-emergency department visits     | EMR, claims, membership files (death) |
| <b>Secondary Outcomes</b>                                                          |                                       |
| COPD-related deaths-hospitalizations-observation stays-emergency department visits | EMR, claims, membership files (death) |
| Outpatient treated COPD exacerbations                                              | EMR, pharmacy                         |
| Cardio-metabolic markers (body mass index, systolic blood pressure,                | EMR                                   |

|                                                                                                                           |                                            |
|---------------------------------------------------------------------------------------------------------------------------|--------------------------------------------|
| diastolic blood pressure, HbA1C, low density lipoprotein, high density lipoprotein, triglycerides, and total cholesterol) |                                            |
| Health related quality of life (Physical and mental)                                                                      | PROMIS-10 survey                           |
| Symptom burden                                                                                                            | COPD Assessment Test                       |
| Depression                                                                                                                | PHQ-8                                      |
| Anxiety                                                                                                                   | GAD-7                                      |
| Health behaviors                                                                                                          |                                            |
| Self-reported physical activity from routine care                                                                         | EMR (exercise vital sign)                  |
| Physical activity history in 30's, 40's, 50's                                                                             | Survey                                     |
| Sedentary time (hrs)                                                                                                      | Survey                                     |
| Sleep (hrs)                                                                                                               | Survey                                     |
| Perception of support for physical activity                                                                               | Survey                                     |
| Satisfaction with Walk On! program components                                                                             | Survey and semi-structured exit interviews |
| <b>Process Measures</b>                                                                                                   |                                            |
| Uptake/penetration of recruitment outreach                                                                                | Study tracker                              |
| % patients agreed to participate                                                                                          |                                            |
| % patients completed baseline visit (enrolled)                                                                            |                                            |
| Reasons for withdrawals, drop outs, & lost to F/U                                                                         | Study tracker                              |
| % completed at least 4 coaching calls in first 5 weeks                                                                    | Study dashboard                            |
| Total # phone contacts over 12 months (median, min, max) overall and by activity sensor used                              | Study dashboard                            |
| % participants attending group visits (1, 2-5, 6+)                                                                        | Study tracker                              |
| Change in step counts over 12 months                                                                                      | Study dashboard                            |
| Physical activity coaches' perception of enablers and barriers to implementation of Walk On                               | Ongoing weekly coaches meeting             |

659

## 660 Analytical Plan

661 Descriptive statistics will be calculated prior to conducting the primary analyses. For all analyses,  
662 data consistency and assumptions required, e.g., normality of responses will be checked. Any data  
663 transformation or alternative methods necessary to analyze the data will be determined by examining  
664 the data structure. Baseline characteristics will be compared between the two groups to assess whether  
665 randomization balanced the group characteristics. The analyses will follow an intent-to-treat (ITT)  
666 strategy, i.e. the analyses will include all randomized participants in the groups to which they were  
667 randomly assigned, regardless of their adherence with the treatment and subsequent withdrawal.

668

### 669 Analysis for Aim #2

670 To test the primary hypothesis that the proportion of patients with any occurrence of all-cause  
671 hospitalizations, ED visits, observation stays, and death 12 months after randomization will be  
672 significantly lower in the Walk On! intervention group compared to standard care, we will use logistic  
673 regression adjusted for randomization stratification variables (medical centers, time from  
674 hospitalization/ED/Ob Stay, level of activity and age). For the secondary outcomes, logistic regression  
675 will be used for categorical outcomes and analysis of variance will be used for continuous outcomes.  
676 Baseline characteristics that are unbalanced between the two groups will be included as covariates.  
677 Baseline characteristics for patients who do not complete the study due to health plan disenrollment  
678 will be compared to the patients who complete the study and differential “drop outs” between the two  
679 groups will be assessed by an interaction test between the intervention group and drop-out indicators.  
680 We expect little to no missing data for the health care utilization outcomes. Secondary as-treated  
681 analyses will be conducted based on actual treatment received to assess the efficacy of the intervention.  
682 Results from this analysis will be compared to the ITT analysis and any differences will be reported and  
683 interpreted with caution.



684 Since some participants will have follow-up data as far as 3 years after randomization, we will  
685 perform additional analyses to evaluate the intervention effect on long-term outcomes. We will use  
686 Poisson regression to assess the intervention effect on the average events during the entire study period  
687 and use survival analyses to assess the intervention effect on time to the first event. Generalized  
688 estimating equation (GEE) and mixed effects models will be used to compare the average proportions  
689 and mean changes for continuous outcomes between intervention groups, while taking into account  
690 correlated measures.

691

### 692 ***Heterogeneity of treatment effect (Aim #3)***

693 We will assess heterogeneity of treatment effect by testing for a limited number of interactions,  
694 to determine whether intervention effects differ by patient subgroups, e.g. presence of other common  
695 morbidities (heart failure, diabetes, depression, and anxiety), level of social support, race/ethnicity  
696 (White vs. non-White), gender, age, and access to the Internet. These are pre-planned hypotheses and  
697 significant treatment heterogeneity will be declared through interaction tests with a standard alpha-  
698 level. The nature of the heterogeneity will be further assessed through subgroup analysis. Point  
699 estimates and appropriate confidence intervals will be presented. We may conduct other exploratory  
700 interaction and subgroup analyses, for which, appropriate alpha adjustment will be made to minimize  
701 the chance finding (type I error). Although these analyses will be exploratory in nature, it is critical that  
702 we understand what patient characteristics are associated with response to Walk On! in order to  
703 appropriately target the intervention in future dissemination efforts.

704

### 705 ***Missing data***

706 Because of our integrated health delivery system and ability to capture all utilization internally  
707 and externally, we expect little to no missing data for the primary outcome or other secondary measures  
708 of health care utilization. For other EMR-based secondary measures such as self-reported physical  
709 activity and cardio-metabolic markers, we also expect to have nearly complete data since this patient  
710 cohort has on average 16 outpatient encounters with our health system annually. We will only analyze  
711 A1C and lipid data in the subset of patients with diabetes and cardiovascular disease. We expect a  
712 higher level of missing data for PROs (symptoms, quality of life). Baseline characteristics will be  
713 compared between patients with and without PRO data. For any missing data, we will assess whether  
714 data is likely missing completely at random (MCAR) or missing at random (MAR) or missing not at  
715 random (MNAR) by comparing patient characteristics. Sensitivity analysis and appropriate missing data  
716 imputation techniques will be deployed depending on the types of missing data. Results will be  
717 compared and differences will be interpreted with caution.

718

### 719 ***Measuring and accounting for confounders***

720 All characteristics we can obtain from EMR and membership files will be extracted. This includes  
721 but is not limited to age, gender, marital status, insurance status, race/ethnicity, smoking status, BMI,  
722 Charlson index, O2 use, FEV1%predicted, prior number of hospitalization, etc. Due to randomization, we  
723 do not expect baseline values of these covariates will confound the data analysis assessing the  
724 effectiveness of Walk On! using the ITT samples. However, it is likely that these variables may confound  
725 the data analysis assessing the efficacy of Walk On! using the patients who actually receive the  
726 intervention (as-treated sample). This is because intervention acceptance, uptake and adherence may  
727 vary by patient characteristics and outcomes may vary by these characteristics. We will assess potential  
728 confounding and report results with and without appropriate adjustment.

729

### 730 ***Qualitative analysis for Aim #4***

731 Interviews will be conducted with a random sample of active Walk On! participants at 6 month  
732 and 12 month (study completion) post-enrollment in both English and Spanish. These 30-minute  
733 telephone interviews will seek participant feedback about their interaction with coaches, most/least  
734 enjoyable aspects of participation, technical difficulties, improvements in health, and suggested study  
735 improvements.

736 Data will be collected by study staff (“interviewer”) by telephone. The interviewer will type  
737 notes in to a Microsoft Word document during the interview. Immediately following the interview, the  
738 interviewer will review and improve upon the notes. Data will be compiled and pasted in to Microsoft  
739 Excel for analysis. Three project staff will independently code data based on eight thematic elements:  
740 most enjoyable aspect of program; least enjoyable aspect of program; will participant continue physical  
741 activity after the year of program participation; how long should the program last; technology; coach  
742 interaction; stamina/changes in health due to program; suggested program improvements. Staff will  
743 meet to review coding and resolve coding differences through discussion. Data will be triangulated with  
744 survey response data, support group session visits, and information gathered during coaches calls. Data  
745 will be reviewed by project staff and the Primary Investigator to determine saturation and identify areas  
746 for further clarification.

747

## 748 **Sample Size Estimates**

749

### 750 ***Primary composite outcome (hospitalizations/ED visit/observation stays/death)***

751 We have factored in features of this pragmatic study design such as randomizing all eligible  
752 patients and analyzing patients according to their group assignment regardless of the level of  
753 participation into our sample size calculations. Data from previous studies of self-management  
754 interventions in COPD showed a relative reduction of 30% in hospitalizations over 12 months of follow-  
755 up in volunteer sample with similar risk for hospitalizations.<sup>51,52</sup> Our previous observational findings  
756 showed that any level of moderate to vigorous PA was associated with a 34% reduction in 30-day all-  
757 cause readmissions for patients with an index COPD hospitalization.<sup>11</sup> Similarly, our more recent  
758 longitudinal analyses found that any level of PA was associated with a 38% reduction in mortality within  
759 12-months after a COPD hospitalization.<sup>50</sup> In addition, our preliminary data suggest that nearly 50% of  
760 patients who had a COPD-related hospitalization, ED visit, or observation stay will have another hospital-  
761 based encounter, and a 20% will die in the subsequent 12 months.

762

763 Assuming that approximately 50% of the Walk On! patients participate in any aspect of the  
764 intervention, we estimated a conservative absolute reduction of 7% (relative reduction~10%) in the  
765 composite primary outcome of all-cause hospitalizations, ED visits, observation stays, and death.  
766 Allowing for a 15% disenrollment from the health plan and two-tailed  $\alpha=.05$ , we anticipated that by  
767 enrolling a total of 1,650 patients, we will have 80% power to detect an absolute reduction of 7% in the  
768 primary composite outcome (70% vs. 63%).

769

770 *Note: Rationale for updated sample size target and power calculation approved by DSMB, PCORI and IRB*  
771 *in July 2016*

772

773 Assuming a revised target sample of  $n=2,700$ , allowing for 15% disenrollment and two-tailed  $\alpha=.05$ , we  
774 will have 80% power to detect an effect as small as an absolute difference of 5.5% in the primary  
775 composite outcome of deaths, hospitalizations, observation stays, and ED visits between Walk On! and  
776 standard care (64.5% vs. 70%). Thus, with this revised target sample, we have adequate power to detect  
777 effect size that is smaller than our original proposed 7% absolute difference.

778

779 At this point, the target uptake rate that would translate to a minimum of 5.5% difference in the primary  
 780 composite outcome between Walk On! and standard care in the intention to treat analysis is largely  
 781 unknown. Based on the DSMB’s review of the blinded Kaplan Meier curves for the study  
 782 outcomes/adverse events thus far, the board thought it is possible that the average effects could be  
 783 larger than our original proposed 7% absolute difference even with the uptake rate we have  
 784 experienced so far in this trial. Given this uncertainty, the DSMB encouraged the team to continue to  
 785 optimize our recruitment strategies and not to be particularly concerned about achieving an uptake  
 786 threshold.

787

788 **Secondary EMR based outcomes**

789 For continuous EMR based outcomes, such as cardio-metabolic markers, this sample size will  
 790 allow us to have at least 90% power to detect a small effect size of 0.20; the smallest effect size we can  
 791 detect with 80% power is 0.16. We expect stronger intervention effects on the secondary outcomes of  
 792 COPD-related events and proportion of inactive patients; thus, we have more than sufficient power to  
 793 detect significant and clinically meaningful effects on these outcomes.

794

795 **Secondary patient-reported outcome (COPD Assessment Test, CAT)**

796 Our power calculation ( $\alpha=.05$ ;  $\beta=.80$ ) to detect a minimally clinically important difference in the  
 797 primary PRO measure (COPD Assessment Test:  $\Delta$  2 points, SD: 5.2) showed that we need to have at least  
 798 112 completed 12-month survey responses. Factoring 20% attrition and a response rate of 45-60%  
 799 using a combination of mail and telephone survey administration, we need to approach and administer  
 800 the surveys to approximately 250 randomly selected standard care patients. Note: Change to sample.

801

802 **Safety Monitoring**

803 The data and safety monitoring plan for this study included monitoring recruitment progress  
 804 and potential adverse events resulting from data collection and the intervention activities. Since the  
 805 pragmatic design precluded active outreach to the standard care patients, we relied on EMR-based data  
 806 to conduct ongoing surveillance of events that resulted in a care encounter for safety monitoring. All  
 807 serious adverse events related to study procedures were reported to the IRB and data safety monitoring  
 808 board (DSMB).

809

810 **Project Milestones and Timeline**

811

| Table 5. Milestones and Timeline                      | Y1  |     |     |     | Y2  |     |     |     | Y3  |      |      |      | Y4   |      |      |      |
|-------------------------------------------------------|-----|-----|-----|-----|-----|-----|-----|-----|-----|------|------|------|------|------|------|------|
|                                                       | Q 1 | Q 2 | Q 3 | Q 4 | Q 5 | Q 6 | Q 7 | Q 8 | Q 9 | Q 10 | Q 11 | Q 12 | Q 13 | Q 14 | Q 15 | Q 16 |
| Project kick-off meeting                              | X   |     |     |     |     |     |     |     |     |      |      |      |      |      |      |      |
| IRB approval                                          | X   |     |     |     |     |     |     |     |     |      |      |      |      |      |      |      |
| Pilot test Walk On! intervention at 4 medical centers | X   | X   |     |     |     |     |     |     |     |      |      |      |      |      |      |      |
| Develop & finalize intervention delivery tools in EMR | X   |     |     |     |     |     |     |     |     |      |      |      |      |      |      |      |
| Refine algorithms to identify participants from EMR   | X   |     |     |     |     |     |     |     |     |      |      |      |      |      |      |      |
| Refine algorithms to ascertain outcomes from EMR      |     | X   |     |     |     |     |     |     |     |      |      |      |      |      |      |      |
| Stakeholder meetings                                  |     | X   | X   | X   | X   | X   | X   | X   | X   | X    | X    | X    | X    | X    | X    | X    |
| Data Safety Monitoring Board meetings                 | X   |     |     |     | X   |     | X   |     | X   |      | X    |      | X    |      |      |      |
| Identify and enroll new study participants            |     |     | X   | X   | X   | X   | X   | X   | X   | X    |      |      |      |      |      |      |
| Implementation of Walk On! intervention               |     |     | X   | X   | X   | X   | X   | X   | X   | X    | X    | X    | X    | X    |      |      |
| Process evaluation (formative and summative)          |     |     |     | X   | X   | X   | X   | X   | X   | X    | X    | X    | X    | X    |      |      |
| Data collection and outcome ascertainment             |     |     |     | X   | X   | X   | X   | X   | X   | X    | X    | X    | X    | X    | X    |      |
| Data management, monitoring, QC, analysis             |     |     | X   | X   | X   | X   | X   | X   | X   | X    | X    | X    | X    | X    | X    | X    |
| Dissemination: manuscripts and abstracts              |     |     |     |     |     |     |     |     |     |      | X    | X    | X    | X    | X    | X    |

812

813 **REFERENCES**

814

815 1. Minino A, Xu J, Kochanek K. *Deaths: Preliminary Data for 2008. National Vital Statistics Reports.*

816 *National Center for Health Statistics.* Hyattsville, MD: Centers for Disease Control;2011.

817 2. Mannino DM, Homa DM, Akinbami LJ, Ford ES, Redd SC. Chronic obstructive pulmonary disease

818 surveillance-United States, 1971-2000. *Morbidity and Mortality Weekly Report.* 2002;51(ss-6):1-16.

819 3. Booth S, Dudgeon D. *Dyspnea in Advanced Disease: A Guide to Clinical Management.* Oxford: Oxford

820 University Press; 2006.

821 4. Booth S, Silvester S, Todd C. Breathlessness in cancer and chronic obstructive pulmonary disease:

822 using a qualitative approach to describe the experience of patients and carers. *Palliat Support Care.*

823 2003;1(4):337-344.

824 5. Garcia-Aymerich J, Farrero E, Felez MA, Izquierdo J, Marrades RM, Anto JM. Risk factors of

825 readmission to hospital for a COPD exacerbation: a prospective study. *Thorax.* 2003;58(2):100-105.

826 6. Pitta F, Troosters T, Probst VS, Spruit MA, Decramer M, Gosselink R. Physical activity and

827 hospitalization for exacerbation of COPD. *Chest.* 2006;129(3):536-544.

828 7. Garcia-Aymerich J, Lange P, Benet M, Schnohr P, Anto JM. Regular physical activity reduces hospital

829 admission and mortality in chronic obstructive pulmonary disease: a population based cohort study.

830 *Thorax.* 2006;61(9):772-778.

831 8. Waschki B, Kirsten A, Holz O, et al. Physical activity is the strongest predictor of all-cause mortality in

832 patients with chronic obstructive pulmonary disease: a prospective cohort study. *Chest.*

833 2011;140(2):331-342.

834 9. Moy ML, Teylan M, Weston NA, Gagnon DR, Garshick E. Daily step count predicts acute

835 exacerbations in a US cohort with COPD. *PLoS One.* 2013;8(4):e60400.

836 10. Zanolta SJ, ZuWallack R. Directly measured physical activity as a predictor of hospitalizations in

837 patients with chronic obstructive pulmonary disease. *Chron Respir Dis.* 2013;10:207.

838 11. Nguyen HQ, Chu L, Liu IL, et al. Associations between Physical Activity and 30-Day Readmission Risk

839 in Chronic Obstructive Pulmonary Disease. *Ann Am Thorac Soc.* 2014;11(5):695-705.

840 12. Bradley EH, Sipsma H, Horwitz LI, Curry L, Krumholz HM. Contemporary Data About Hospital

841 Strategies to Reduce Unplanned Readmissions: What Has Changed? *JAMA internal medicine.* 2013.

842 13. Brock J, Mitchell J, Irby K, et al. Association between quality improvement for care transitions in

843 communities and rehospitalizations among Medicare beneficiaries. *JAMA.* 2013;309(4):381-391.

844 14. Hansen LO, Young RS, Hinami K, Leung A, Williams MV. Interventions to reduce 30-day

845 rehospitalization: a systematic review. *Ann Intern Med.* 2011;155(8):520-528.

846 15. Spruit MA, Singh SJ, Garvey C, et al. An official american thoracic society/european respiratory

847 society statement: key concepts and advances in pulmonary rehabilitation. *Am J Respir Crit Care*

848 *Med.* 2013;188(8):e13-64.

849 16. Lacasse Y, Goldstein R, Lasserson TJ, Martin S. Pulmonary rehabilitation for chronic obstructive

850 pulmonary disease. *Cochrane Database Syst Rev.* 2006(4):CD003793.

851 17. Johnston K, Grimmer-Somers K. Pulmonary rehabilitation: overwhelming evidence but lost in

852 translation? *Physiother Can.* 2010;62(4):368-373.

853 18. Johnston KN, Young M, Grimmer KA, Antic R, Frith PA. Barriers to, and facilitators for, referral to

854 pulmonary rehabilitation in COPD patients from the perspective of Australian general practitioners:

855 a qualitative study. *Prim Care Respir J.* 2013.

856 19. Keating A, Lee A, Holland AE. What prevents people with chronic obstructive pulmonary disease

857 from attending pulmonary rehabilitation? A systematic review. *Chron Respir Dis.* 2011;8(2):89-99.

858 20. Ries AL, Kaplan RM, Myers R, Prewitt LM. Maintenance after pulmonary rehabilitation in chronic

859 lung disease: A randomized trial. *Am J Respir Crit Care Med.* 2003;167(6):880-888.

- 860 21. Pitta F, Troosters T, Probst VS, Langer D, Decramer M, Gosselink R. Are patients with COPD more  
861 active after pulmonary rehabilitation? *Chest*. 2008;134(2):273-280.
- 862 22. Mador MJ, Patel AN, Nadler J. Effects of Pulmonary Rehabilitation on Activity Levels in Patients With  
863 Chronic Obstructive Pulmonary Disease. *J Cardiopulm Rehabil Prev*. 2011;31(1):52-59.
- 864 23. Leidy NK, Kimel M, Ajagbe L, Kim K, Hamilton A, Becker K. Designing trials of behavioral  
865 interventions to increase physical activity in patients with COPD: insights from the chronic disease  
866 literature. *Respir Med*. 2014;108(3):472-481.
- 867 24. Vaes AW, Cheung A, Atakhorrani M, et al. Effect of 'activity monitor-based' counseling on physical  
868 activity and health-related outcomes in patients with chronic diseases: A systematic review and  
869 meta-analysis. *Ann Med*. 2013;45(5-6):397-412.
- 870 25. Berry MJ, Rejeski WJ, Miller ME, et al. A lifestyle activity intervention in patients with chronic  
871 obstructive pulmonary disease. *Respir Med*. 2010;104(6):829-839.
- 872 26. Steele BG, Belza B, Cain KC, et al. A randomized clinical trial of an activity and exercise adherence  
873 intervention in chronic pulmonary disease. *Arch Phys Med Rehabil*. 2008;89(3):404-412.
- 874 27. Liu WT, Wang CH, Lin HC, et al. Efficacy of a cell phone-based exercise programme for COPD. *Eur*  
875 *Respir J*. 2008;32(3):651-659.
- 876 28. Hospes G, Bossenbroek L, Ten Hacken NH, van Hengel P, de Greef MH. Enhancement of daily  
877 physical activity increases physical fitness of outclinic COPD patients: results of an exercise  
878 counseling program. *Patient Educ Couns*. 2009;75(2):274-278.
- 879 29. de Blok BM, de Greef MH, ten Hacken NH, Sprenger SR, Postema K, Wempe JB. The effects of a  
880 lifestyle physical activity counseling program with feedback of a pedometer during pulmonary  
881 rehabilitation in patients with COPD: a pilot study. *Patient Educ Couns*. 2006;61(1):48-55.
- 882 30. Nguyen H, Gill D, Wolpin S, Steele B, Benditt J. Pilot study of a cell phone-based exercise persistence  
883 intervention post-rehabilitation in COPD. *International Journal of COPD*. 2009;4:1-13.
- 884 31. Mendoza L, Horta P, Espinoza J, et al. Pedometers to enhance physical activity in COPD: a  
885 randomised controlled trial. *Eur Respir J*. 2015;45(2):347-354.
- 886 32. Nguyen HQ, Donesky D, Reinke LF, et al. Internet-based dyspnea self-management support for  
887 patients with chronic obstructive pulmonary disease. *J Pain Symptom Manage*. 2013;46(1):43-55.
- 888 33. Nguyen HQ, Donesky-Cuenco D, Wolpin S, et al. Randomized controlled trial of an internet-based  
889 versus face-to-face dyspnea self-management program for patients with chronic obstructive  
890 pulmonary disease: pilot study. *J Med Internet Res*. 2008;10(2):e9.
- 891 34. Moy ML, Weston NA, Wilson EJ, Hess ML, Richardson CR. A pilot study of an Internet walking  
892 program and pedometer in COPD. *Respir Med*. 2012;106(9):1342-1350.
- 893 35. Thorpe KE, Zwarenstein M, Oxman AD, et al. A pragmatic-explanatory continuum indicator summary  
894 (PRECIS): a tool to help trial designers. *CMAJ*. 2009;180(10):E47-57.
- 895 36. Adamson J, Cockayne S, Puffer S, Torgerson DJ. Review of randomised trials using the post-  
896 randomised consent (Zelen's) design. *Contemp Clin Trials*. 2006;27(4):305-319.
- 897 37. Zelen M. A new design for randomized clinical trials. *N Engl J Med*. 1979;300(22):1242-1245.
- 898 38. Bandura A. *Social foundations of thought and action. A social cognitive theory*. Englewood Cliffs, NJ:  
899 Prentice Hall; 1986.
- 900 39. Clark NM, Gong M, Kaciroti N. A model of self-regulation for control of chronic disease. *Health Educ*  
901 *Behav*. 2001;28(6):769-782.
- 902 40. Clark NM, Zimmerman BJ. A social cognitive view of self-regulated learning about health. *Health*  
903 *Education Research*. 1990;5(3):371-379.
- 904 41. Miller WR, Rollnick S. *Motivational Interviewing*. 2nd ed. New York: Guilford press; 2002.
- 905 42. Walker PP, Burnett A, Flavahan PW, Calverley PM. Lower limb activity and its determinants in COPD.  
906 *Thorax*. 2008;63(8):683-689.

- 907 43. Oka RK, King AC, Young DR. Sources of social support as predictors of exercise adherence in women  
908 and men ages 50 to 65 years. *Women's Health Research on Gender, Behavior, and Policy*.  
909 1995;1(2):161-175.
- 910 44. Nguyen HQ, Steele BG, Dougherty CM, Burr RL. Physical Activity Patterns of Patients With  
911 Cardiopulmonary Illnesses. *Arch Phys Med Rehabil*. 2012.
- 912 45. Moy ML, Janney AW, Nguyen HQ, et al. Use of pedometer and Internet-mediated walking program  
913 in patients with chronic obstructive pulmonary disease. *J Rehabil Res Dev*. 2011;47(5):485-496.
- 914 46. Sallis R, Roddy-Sturm Y, Chijioke E, et al. Stepping toward discharge: Level of ambulation in  
915 hospitalized patients. *J Hosp Med*. 2015.
- 916 47. Anthonisen NR, Manfreda J, Warren CP, Hershfield ES, Harding GK, Nelson NA. Antibiotic therapy in  
917 exacerbations of chronic obstructive pulmonary disease. *Ann Intern Med*. 1987;106(2):196-204.
- 918 48. Rodriguez-Roisin R. Toward a consensus definition for COPD exacerbations. *Chest*. 2000;117(5 Suppl  
919 2):398S-401S.
- 920 49. Liu IA, Moy ML, Estrada E, Rippberger E, Nguyen HQ. An 'Exercise Vital Sign' is a Valid Proxy Measure  
921 of Physical Activity in COPD in Routine Clinical Care. *Translational J of the American College of Sports  
922 Medicine*. 2017;2(23):148-152.
- 923 50. Moy ML, Gould MK, Liu IA, Lee JS, Nguyen HQ. Physical activity assessed in routine care predicts  
924 mortality after a COPD hospitalisation. *ERJ Open Res*. 2016;2(1).
- 925 51. Bourbeau J, Julien M, Maltais F, et al. Reduction of hospital utilization in patients with chronic  
926 obstructive pulmonary disease: a disease-specific self-management intervention. *Arch Intern Med*.  
927 2003;163(5):585-591.
- 928 52. Rice KL, Dewan N, Bloomfield HE, et al. Disease management program for chronic obstructive  
929 pulmonary disease: a randomized controlled trial. *Am J Respir Crit Care Med*. 2010;182(7):890-896.

930
