# Supplementary material for: Effect of Physical Activity Coaching on Acute Care and Survival Among Patients With Chronic Obstructive Pulmonary Disease: A Pragmatic Randomized Clinical Trial
Source: PubMed Central journal article supplement (PMC6704745; doi:10.1001/jamanetworkopen.2019.9657), 2019-08-16
Supplement: jamanetwopen-2-e199657-s002.pdf [file jamanetwopen-2-e199657-s002.pdf]

## Supplementary Online Content

Nguyen HQ, Moy ML, Liu I-LA, et al. Effect of physical activity coaching on acute care and survival among patients with chronic obstructive pulmonary disease: a pragmatic randomized clinical trial. *JAMA Netw Open*. 2019;2(8):e199657. doi:10.1001/jamanetworkopen.2019.9657

**eMethods.** Additional Statistical Analysis Information

**eTable 1.** Additional Baseline Characteristics

**eTable 2.** Walk On! Participants Process and Satisfaction Measures

**eTable 3.** Time-to-Event Analyses of the Walk On! Intervention on the Primary Composite Outcome of All-Cause Hospitalizations, Observation Stays, Emergency Department Visits, and Death

**eTable 4.** Cardio-metabolic Markers Post-randomization

**eFigure 1.** Steps per Day Change Over 12 Months for Walk On! Participants Who Shared Their Data, by Level of Functioning at Baseline

**eFigure 2.** Intent-to-Treat Adjusted Time-to-Event Analyses of the Walk On! Intervention on the Primary Composite Outcome of All-Cause Hospitalizations, Observation Stays, Emergency Department Visits, and Death 12-Months Post-randomization

**eFigure 3.** As-Treated Adjusted Time-to-Event Analyses of the Walk On! Intervention on the Primary Composite Outcome of All-Cause Hospitalizations, Observation Stays, Emergency Department Visits, and Death from Months 2-12 Post-randomization

This supplementary material has been provided by the authors to give readers additional information about their work.

## **eMethods.** Additional Statistical Analysis Information

### **Power Calculations**

Updated Power Calculation for Primary Outcome (approved by DSMB, PCORI and IRB in July 2016)

Assuming a revised target sample of  $n=2,700$ , allowing for 15% disenrollment and two-tailed  $\alpha=.05$ , we will have 80% power to detect an effect as small as an absolute difference of 5.5% in the primary composite outcome of deaths, hospitalizations, observational stays, and ED visits between Walk On! and standard care (64.5% vs. 70%). Thus, with this revised target sample, we have adequate power to detect effect size that is smaller than our original proposed 7% absolute difference.

At the time of the revised power calculation, the target uptake rate that would translate to a minimum of 5.5% difference in the primary composite outcome between Walk On! and standard care in the intention to treat analysis was largely unknown. Based on the DSMB's review of the blinded Kaplan Meier curves for the study outcomes/adverse events at that time, the board thought it was possible that the average effects could be larger than our original proposed 7% absolute difference even with the uptake rate we experienced up to that point. Given this uncertainty, the DSMB encouraged the team to continue to optimize recruitment strategies and not to be particularly concerned about achieving an uptake threshold.

Power Calculation for the Primary PRO Measure (COPD Assessment Test, CAT): A total of 112 complete 12-month follow-up survey responses would be needed to detect a minimally clinically important difference between groups (CAT:  $\Delta$  2 points, SD: 5.2).

### **Statistical Analysis**

Baseline characteristics in the year prior to the randomization were compared between groups using chi-square test for categorical variables, t-test or Wilcoxon rank-sum test for continuous variables where appropriate.

Analysis of variance or linear regression models were used to assess intervention effect on continuous outcomes, adjusting for baseline values.

Intent-to-treat multivariate analyses adjusted for randomization stratification variables (age, PA level, length of time since acute care utilization to randomization, and study site) as well as other prognostic variables (FEV1%predicted, Charlson comorbidity index, oxygen use, hospitalization for COPD in previous 12 months, outpatient treated COPD exacerbation in previous 12 months, and use of LABA or ICS).

We tested whether the intervention effects differed by pre-specified baseline characteristics (morbidities, level of social support, race/ethnicity, gender, age, and Internet access). These were examined by adding an interaction term in the models between the group indicator and the subgroup indicator and testing for significant interactions between the two.

| <b>eTable 1. Additional Baseline Characteristics<sup>a</sup></b> |                              |                               |                          |                          |                                |                                     |                                |
|------------------------------------------------------------------|------------------------------|-------------------------------|--------------------------|--------------------------|--------------------------------|-------------------------------------|--------------------------------|
| <b>Variables</b>                                                 | <b>Total Sample (n=2707)</b> | <b>Standard Care (n=1349)</b> | <b>Walk On! (n=1358)</b> | <b>P Value SC vs. WO</b> | <b>WO Participants (n=321)</b> | <b>WO Non-Participants (n=1037)</b> | <b>P Value WO P vs. Non- P</b> |
| <b>Immunization</b>                                              |                              |                               |                          |                          |                                |                                     |                                |
| Influenza vaccination (prior year)                               | 2369 (88%)                   | 1180 (87%)                    | 1189 (88%)               | .95                      | 286 (89%)                      | 903 (87%)                           | .34                            |
| Pneumonia vaccination (up to 5 yrs)                              | 1391 (51%)                   | 681 (50%)                     | 710 (52%)                | .35                      | 160 (50%)                      | 550 (53%)                           | .32                            |
| <b>Pulmonary Rehabilitation (up to past 3 yr)</b>                |                              |                               |                          |                          |                                |                                     |                                |
|                                                                  | 169 (6%)                     | 82 (6%)                       | 87 (6%)                  | .72                      | 27 (8%)                        | 60 (6%)                             | .09                            |
| <b>Medications</b>                                               |                              |                               |                          |                          |                                |                                     |                                |
| Short-acting beta-agonist                                        | 2420 (92%)                   | 1202 (92%)                    | 1218 (92%)               | .49                      | 299 (94%)                      | 919 (92%)                           | .23                            |
| Short-acting anticholinergic                                     | 1053 (40%)                   | 525 (40%)                     | 528 (40%)                | .99                      | 130 (41%)                      | 398 (40%)                           | .74                            |
| Inhaled corticosteroids (ICS)                                    | 2147 (82%)                   | 1094 (84%)                    | 1053 (80%)               | .02                      | 264 (83%)                      | 789 (79%)                           | .12                            |
| <b>Charlson Comorbidity Index</b>                                |                              |                               |                          |                          |                                |                                     |                                |
| Quartile 1                                                       | 1022 (38%)                   | 506 (38%)                     | 516 (38%)                | .68                      | 142 (44%)                      | 374 (36%)                           | .06                            |
| Quartile 2                                                       | 441 (16%)                    | 210 (16%)                     | 231 (17%)                |                          | 53 (17%)                       | 178 (17%)                           |                                |
| Quartile 3                                                       | 680 (25%)                    | 348 (26%)                     | 332 (24%)                |                          | 68 (21%)                       | 264 (25%)                           |                                |
| Quartile 4                                                       | 564 (21%)                    | 285 (21%)                     | 279 (21%)                |                          | 58 (18%)                       | 221 (21%)                           |                                |
| <b>Cardio-metabolic markers<sup>b</sup></b>                      |                              |                               |                          |                          |                                |                                     |                                |
| <b>Blood pressure</b>                                            | n=2700                       | n=1347                        | n=1353                   |                          | n=320                          | n=1033                              |                                |
| Systolic blood pressure                                          | 132.0 (12.7)                 | 132.1 (12.9)                  | 131.8 (12.5)             | .60                      | 131.2 (12.6)                   | 132.0 (12.4)                        | .35                            |
| Diastolic blood pressure                                         | 71.2 (8.6)                   | 71.4 (8.6)                    | 71.1 (8.6)               | .44                      | 71.1 (8.2)                     | 71.1 (8.7)                          | .86                            |
| <b>HbA1c (diabetics only)</b>                                    | n=829                        | n=426                         | n=403                    |                          | n=96                           | n=307                               |                                |
|                                                                  | 7.2 (1.2)                    | 7.2 (1.2)                     | 7.2 (1.2)                | .21                      | 7.2 (1.1)                      | 7.3 (1.3)                           | .82                            |
| <b>Cholesterol</b>                                               |                              |                               |                          |                          |                                |                                     |                                |
| LDL (mg/dL)                                                      | n=1536                       | n=765                         | n=771                    | .80                      | n=194                          | n=577                               | .51                            |
|                                                                  | 91.7 (32.8)                  | 92.0 (33.8)                   | 91.3 (31.8)              |                          | 90.1 (31.3)                    | 91.8 (32.0)                         |                                |
| HDL (mg/dL)                                                      | n=1520                       | n=757                         | n=763                    | .51                      | n=189                          | n=574                               | .34                            |
|                                                                  | 54.9 (17.4)                  | 55.1 (17.5)                   | 54.6 (17.3)              |                          | 55.2 (16.2)                    | 54.4 (17.7)                         |                                |
| Total cholesterol (mg/dL)                                        | n=1521                       | n=756                         | n=765                    | .55                      | n=190                          | n=575                               | .49                            |
|                                                                  | 169.1 (41.4)                 | 170.3 (42.4)                  | 168.0 (40.3)             |                          | 166.6 (37.9)                   | 168.5 (41.1)                        |                                |
| Triglycerides (mg/dL)                                            | n=1031                       | n=506                         | n=525                    | .31                      | n=131                          | n=394                               | .08                            |
|                                                                  | 121.3 (77.4)                 | 120.3 (77.1)                  | 122.2 (77.8)             |                          | 113.8 (86.2)                   | 125.0 (74.7)                        |                                |
| <b>Body mass index (BMI)</b>                                     | 27.1 (5.9)                   | 27.0 (6.0)                    | 27.1 (5.9)               | .66                      | 27.5 (5.8)                     | 27.0 (5.9)                          | .16                            |

**eTable 1. Additional Baseline Characteristics<sup>a</sup>**

| Variables                                    | Total Sample (n=2707) | Standard Care (n=1349) | Walk On! (n=1358) | P Value SC vs. WO | WO Participants (n=321) | WO Non-Participants (n=1037) | P Value WO P vs. Non- P |
|----------------------------------------------|-----------------------|------------------------|-------------------|-------------------|-------------------------|------------------------------|-------------------------|
| Underweight (<18.5)                          | 168 (6%)              | 93 (7%)                | 75 (6%)           | .49               | 15 (5%)                 | 60 (6%)                      | .53                     |
| Normal weight (18.5-24.9)                    | 871 (32%)             | 426 (32%)              | 445 (33%)         |                   | 97 (30%)                | 348 (34%)                    |                         |
| Overweight (25-29.9)                         | 836 (31%)             | 419 (31%)              | 417 (31%)         |                   | 105 (33%)               | 312 (30%)                    |                         |
| Obese (>30)                                  | 824 (31%)             | 408 (30%)              | 416 (31%)         |                   | 103 (32%)               | 313 (30%)                    |                         |
| <b>Health Care Utilization in Prior Year</b> |                       |                        |                   |                   |                         |                              |                         |
| Primary care visits                          | 6.1 (6.5)             | 5.9 (5.4)              | 6.2 (7.4)         | .81               | 6.3 (4.8)               | 6.2 (8.1)                    | .01                     |
| Specialty care visits                        | 9.1 (9.9)             | 9.3 (9.8)              | 8.9 (9.9)         | .20               | 10.4 (11.6)             | 8.4 (9.2)                    | .002                    |
| Urgent care visits                           | 1098 (41%)            | 560 (42%)              | 538 (40%)         | .32               | 138 (43%)               | 400 (39%)                    | .16                     |
|                                              | 0.9 (1.7)             | 0.9 (1.6)              | 0.9 (1.8)         | .42               | 0.9 (1.6)               | 0.9 (1.8)                    | .26                     |
| <b>All Cause</b>                             |                       |                        |                   |                   |                         |                              |                         |
| Hospitalizations                             | 1.0 (1.4)             | 1.0 (1.4)              | 0.9 (1.3)         | .13               | 0.9 (1.1)               | 1.0 (1.4)                    | .68                     |
| Observational stays                          | 0.4 (0.8)             | 0.4 (0.8)              | 0.4 (0.8)         | .79               | 0.4 (0.8)               | 0.4 (0.7)                    | .24                     |
| Emergency department visits                  | 1.9 (3.1)             | 2.0 (3.2)              | 1.9 (3.0)         | .24               | 1.5 (1.8)               | 2.0 (3.3)                    | .006                    |
| <b>COPD-Related</b>                          |                       |                        |                   |                   |                         |                              |                         |
| Hospitalizations                             | 0.5 (0.8)             | 0.6 (0.8)              | 0.5 (0.7)         | .07               | 0.5 (0.7)               | 0.5 (0.7)                    | .48                     |
| Observational stays                          | 0.2 (0.5)             | 0.2 (0.5)              | 0.2 (0.4)         | .64               | 0.2 (0.5)               | 0.2 (0.4)                    | .29                     |
| Emergency department visits                  | 0.8 (1.0)             | 0.8 (1.0)              | 0.8 (1.0)         | .38               | 0.7 (0.8)               | 0.8 (1.0)                    | .10                     |
| Outpatient treated COPD exacerbations        | 1.7 (2.0)             | 1.8 (2.0)              | 1.7 (1.9)         | .05               | 1.9 (2.0)               | 1.6 (1.9)                    | .0007                   |
| <b>Patient Reported Outcomes</b>             |                       |                        |                   |                   |                         |                              |                         |
|                                              |                       | n=268                  |                   |                   | n=320                   |                              |                         |
| COPD Assessment Test (CAT)(↓0-40)            | -                     | 20.9(8.5)              | -                 | .02               | 19.1(7.5)               | -                            | -                       |
| CAT ≥10                                      | -                     | 242(90%)               | -                 | .28               | 280(88%)                | -                            | -                       |
| PHQ-8 (↓0-24)                                | -                     | 7.1 (6.0)              | -                 | .05               | 5.9(5.2)                | -                            | -                       |
| PHQ-8 ≥10                                    | -                     | 81 (31%)               | -                 | <.01              | 65(21%)                 | -                            | -                       |
| GAD-7 (↓0-21)                                | -                     | 5.7(5.9)               | -                 | .32               | 4.8(4.9)                | -                            | -                       |
| GAD-7 ≥10                                    | -                     | 61(23%)                | -                 | .02               | 50(16%)                 | -                            | -                       |
| PROMIS-10 HRQL, Mental Health (21-68↑)       | -                     | 45.0(9.0)              | -                 | .06               | 46.8(8.8)               | -                            | -                       |
| PROMIS-10 HRQL, Physical Health (16-68↑)     | -                     | 39.2(8.6)              | -                 | .03               | 40.1(6.8)               | -                            | -                       |
| Sedentary time (hrs/day) <sup>c</sup>        | -                     | 5.5(4.1)               | -                 | .04               | 4.8(3.0)                | -                            | -                       |

Note: Data are presented as either n(%) or mean(SD).

<sup>a</sup>Baseline values were obtained in the 12 months prior to cohort selection/randomization date

<sup>b</sup>Cardio-metabolic biomarkers include averages for all available BMI, BP, HbA1c, and lipids values over 12 months.

<sup>c</sup>Sedentary time: "In the last 7 days, please estimate the time you spent watching TV or videos on a typical day"

Abbreviations: HbA1c: Hemoglobin A1c; LDL: low density lipoprotein; HDL: high density lipoprotein; CAT: COPD assessment test; PROMIS-10 HRQL: Health-related quality of life; PHQ: Personal Health Questionnaire; GAD-7: Generalized Anxiety Disorder.

| <b>eTable 2. Walk On! Participants Process and Satisfaction Measures</b>          | <b>n (%) or median (IQR)</b> |
|-----------------------------------------------------------------------------------|------------------------------|
| <b>Walk On! Implementation</b>                                                    |                              |
| Participants completing at least 4 planned phone contacts, weeks 1-5              | 264 (83%)                    |
| Number of phone contacts/data reviews, weeks 6-52 for all patients <sup>a</sup>   | 12 (7, 20)                   |
| Omron pedometer users (n=177)                                                     | 12 (6, 21)                   |
| Tractivity sensor users (n=81)                                                    | 10 (6, 14)                   |
| Fitbit Alta users (n=13)                                                          | 10 (3, 18)                   |
| Technical challenges: number of patients receiving at least 2 activity devices    | 72 (22%)                     |
| Participants attending at least one monthly group visit from 4 sites <sup>b</sup> | 104 (42%)                    |
| <b>Overall satisfaction with Walk On!<sup>c</sup></b>                             |                              |
| Recommend Walk On! to other patients with COPD                                    |                              |
| 6 months (n=179)                                                                  | 175 (98%)                    |
| 12 months (n=139)                                                                 | 138 (99%)                    |
| The Walk On! program was easy to fit into my life                                 |                              |
| 6 months (n=177)                                                                  | 165 (93%)                    |
| 12 months (n=139)                                                                 | 135 (97%)                    |

<sup>a</sup>Counts of documentation by the PA coaches on the study dashboard that either included an active phone contact or data review/no active contact. At the start of the study, patients could choose either the Tractivity internet-enabled sensor which is worn on the ankle or the Omron pedometer, worn on the waist. One year into the study, the Tractivity vendor was no longer in business. We were only able to provide the Omron pedometer to patients for six months while we configured our system to integrate the Fitbit Alta (worn on the wrist), as a replacement for the Tractivity sensor.

<sup>b</sup>Two sites had space challenges and did not offer group sessions; n=245 patients from 4 sites

<sup>c</sup>Endorsement of strongly agree or agree on a 4-point Likert scale (1-Strongly agree, 2-Agree, 3-Disagree, 4-Strongly disagree, 5-Not Applicable)

**eTable 3.** Time-to-Event Analyses of the Walk On! Intervention on the Primary Composite Outcome of All-Cause Hospitalizations, Observation Stays, Emergency Department Visits, and Death

|                                                                                                           | Standard Care<br>(n=1349)              | Walk On!<br>(n=1358)                | Unadjusted HR     | Adjusted HR       |
|-----------------------------------------------------------------------------------------------------------|----------------------------------------|-------------------------------------|-------------------|-------------------|
| <b>Primary intent-to-treat analysis: Follow-up for 12 months post randomization<sup>a</sup></b>           |                                        |                                     |                   |                   |
| All-cause acute care utilization and death                                                                | 864 (64%)                              | 883 (65%)                           | 1.00 (0.91, 1.10) | 1.01 (0.92, 1.11) |
| Hospitalizations                                                                                          | 499 (37%)                              | 502 (37%)                           | 0.98 (0.87, 1.11) | 1.01 (0.89, 1.15) |
| Observation stays                                                                                         | 269 (20%)                              | 295 (22%)                           | 1.08 (0.91, 1.27) | 1.08 (0.91, 1.27) |
| Emergency department visits                                                                               | 694 (51%)                              | 702 (52%)                           | 0.99 (0.89, 1.10) | 1.01 (0.91, 1.12) |
| Death                                                                                                     | 117 (9%)                               | 117 (9%)                            | 0.97 (0.75, 1.26) | 1.00 (0.78, 1.30) |
| COPD-related acute care utilization <sup>d</sup>                                                          | 398 (30%)                              | 411 (30%)                           | 1.00 (0.87, 1.15) | 1.04 (0.90, 1.19) |
| <b>Pre-specified, as-treated, IPTW analysis: Follow-up for months 2-12 post randomization<sup>b</sup></b> |                                        |                                     |                   |                   |
|                                                                                                           | Standard Care<br>(n=1310) <sup>c</sup> | Walk On!<br>Participants<br>(n=321) | Unadjusted HR     | Adjusted HR       |
| All-cause acute care utilization and death                                                                | 781 (60%)                              | 185 (58%)                           | 0.94 (0.81, 1.10) | 0.92 (0.79, 1.07) |
| Hospitalizations                                                                                          | 433 (33%)                              | 91 (28%)                            | 0.80 (0.64, 0.99) | 0.89 (0.73, 1.10) |
| Observation stays                                                                                         | 230 (18%)                              | 53 (17%)                            | 0.92 (0.70, 1.22) | 0.72 (0.53, 0.98) |
| Emergency department visits                                                                               | 610 (47%)                              | 144 (45%)                           | 0.93 (0.78, 1.10) | 0.92 (0.77, 1.09) |
| Death                                                                                                     | 95 (7%)                                | 13 (4%)                             | 0.54 (0.30, 0.96) | 0.70 (0.41, 1.19) |
| COPD-related acute care utilization <sup>d</sup>                                                          | 195 (15%)                              | 48 (15%)                            | 0.94 (0.75, 1.18) | 0.94 (0.75, 1.17) |

HR indicates hazard ratio.

<sup>a</sup>Intent-to-treat: Adjusted OR values are from logistic regression models that included age, FEV1%predicted, Charlson comorbidity index, oxygen use, hospitalization for COPD in previous 12 months, outpatient treated COPD exacerbation in previous 12 months, length of time since acute care utilization to randomization, use of LABA or ICS, PA level, and study site.

<sup>b</sup>As-treated: stabilized propensity score inverse probability of treatment weighting (IPTW) was used to balance baseline characteristics (socio-demographics, health behaviors, disease severity, comorbidities, inhalers/medications, and health care utilization in the prior year) between patients who participated in Walk On! and the SC group.

<sup>c</sup>SC patients not included in the as-treated analysis due to disenrollment (n=17) and deaths (n=22) in the first 2 months after randomization.

<sup>d</sup>COPD-related acute care utilization includes hospitalizations, observational stays and ED visits for COPD exacerbations

| <b>eTable 4. Cardio-metabolic Markers Post-randomization</b> |                     |                     |                        |                              |                                |  |
|--------------------------------------------------------------|---------------------|---------------------|------------------------|------------------------------|--------------------------------|--|
|                                                              |                     | <b>Walk On</b>      |                        |                              | <b>Adjusted P Values</b>       |  |
|                                                              | <b>SC</b>           | <b>WO</b>           | <b>WO Participants</b> | <b>SC vs. WO<sup>c</sup></b> | <b>SC vs. WO-P<sup>c</sup></b> |  |
| Blood pressure <sup>a</sup>                                  | n=1127              | n=1186              | n=300                  |                              |                                |  |
| Systolic blood pressure                                      | 130.8 (14.54)       | 130.7 (14.19)       | 128.8 (13.02)          | 0.70                         | 0.06                           |  |
| Diastolic blood pressure                                     | 70.5 (9.59)         | 70.1 (9.63)         | 69.6 (8.85)            | 0.87                         | 0.07                           |  |
| HbA1c (diabetics only) <sup>b</sup>                          | n=412<br>7.1 (1.45) | n=383<br>7.2 (1.36) | n=97<br>7.2 (1.40)     | 0.35                         | 0.67                           |  |
| Cholesterol <sup>b</sup>                                     |                     |                     |                        |                              |                                |  |
|                                                              | n=593               | n=647               | n=174                  |                              |                                |  |
| LDL (mg/dL)                                                  | 91.0 (36.96)        | 86.6 (32.51)        | 85.8 (29.92)           | 0.09                         | 0.13                           |  |
|                                                              | n=620               | n=671               | n=178                  |                              |                                |  |
| HDL (mg/dL)                                                  | 54.3 (18.28)        | 53.1 (17.60)        | 52.8 (16.55)           | 0.82                         | 0.34                           |  |
|                                                              | n=621               | n=673               | n=178                  |                              |                                |  |
| Total cholesterol (mg/dL)                                    | 168.8 (44.91)       | 162.3 (41.82)       | 161.4 (38.31)          | 0.16                         | 0.11                           |  |
|                                                              | n=372               | n=429               | n=114                  |                              |                                |  |
| Triglycerides (mg/dL)                                        | 128.3 (102.36)      | 119.0 (65.60)       | 116.2 (61.36)          | 0.86                         | 0.83                           |  |

Data presented as mean (SD)

Abbreviations: HbA1c: Hemoglobin A1c; LDL: low density lipoprotein; HDL: high density lipoprotein;

<sup>a</sup>Blood pressure (BP): Average of all routine clinic BP readings taken between 6 and 12-months post-randomization. BP obtained with temperatures of >100F and those obtained in urgent care were excluded.

<sup>b</sup>HbA1c and cholesterol levels were obtained on values closest to the 12 months post randomization

<sup>c</sup>ITT and as-treated linear regression analyses adjusted for age, FEV1%predicted, Charlson comorbidity index, oxygen use, hospitalization for COPD in previous 12 months, outpatient treated COPD exacerbation in previous 12 months, length of time since acute care utilization to randomization, use of LABA or ICS, PA level, and study site. IPTW models provided similar results as the multivariate model.



**eFigure 1.** Steps per Day Change Over 12 Months for Walk On! Participants Who Shared Their Data, by Level of Functioning at Baseline

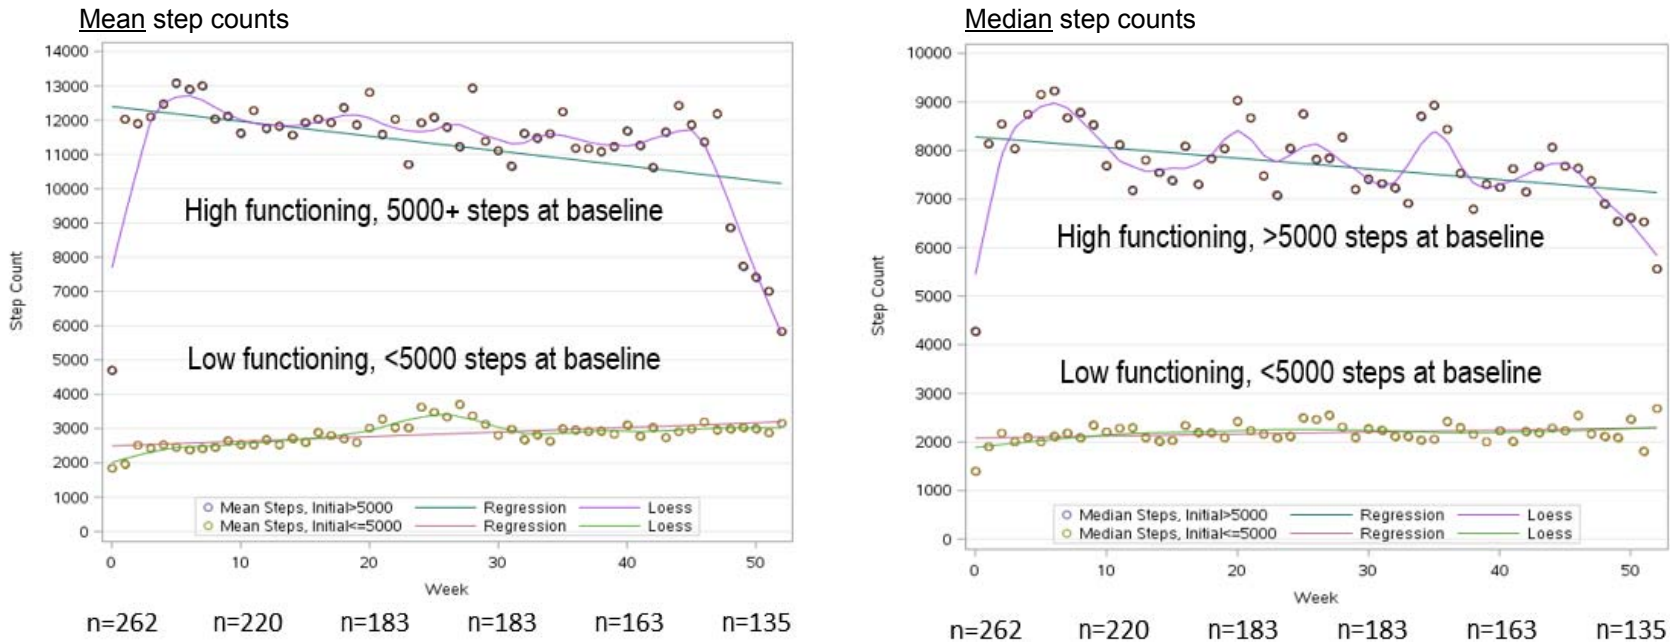

Note: Data in figure represents step count data that participants uploaded to their computer or entered into the phone interactive voice response system on a weekly basis. Only data uploads with non-zero values were included. Due to the heterogeneous sample and wide variation in baseline step count at baseline, mean and median step counts are presented, stratified by level of baseline “functioning”, <5000 steps/day or 5000+ steps per day

**eFigure 2.** Intent-to-Treat Adjusted Time-to-Event Analyses of the Walk On! Intervention on the Primary Composite Outcome of All-Cause Hospitalizations, Observation Stays, Emergency Department Visits, and Death 12-Months Post-randomization

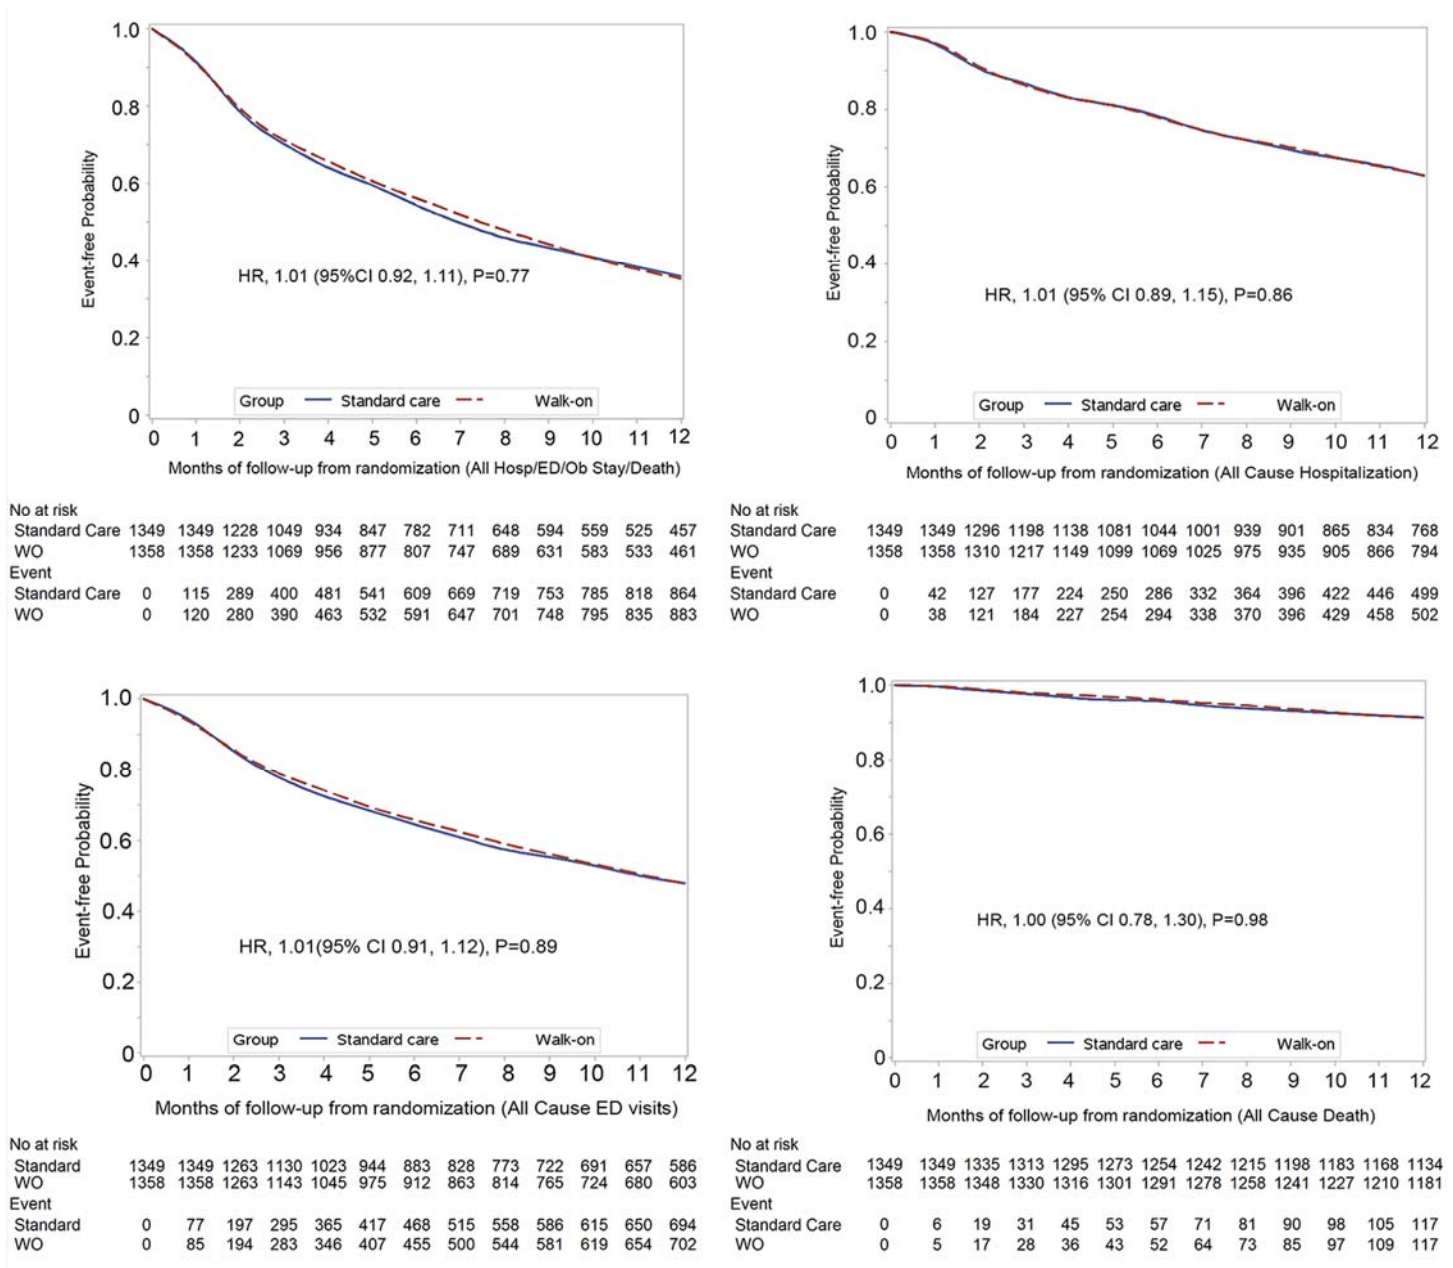

HR indicates hazard ratio. Number of events represents cumulative events and adjusted HRs and P values are from proportional hazards regression models that adjusted for age, FEV1%predicted, Charlson comorbidity index, oxygen use, hospitalization for COPD in previous 12 months, outpatient treated COPD exacerbation in previous 12 months, length of time since acute care utilization to randomization, use of LABA or ICS, PA level, and study site. Observation stays [HR, 1.08 (95% CI 0.91, 1.27), P=0.37] and COPD-related acute care utilization [HR, 1.04 (95% CI 0.90, 1.19), P=0.59] are not presented in the figures

**eFigure 3.** As-Treated Adjusted Time-to-Event Analyses of the Walk On! Intervention on the Primary Composite Outcome of All-Cause Hospitalizations, Observation Stays, Emergency Department Visits, and Death from Months 2-12 Post-randomization

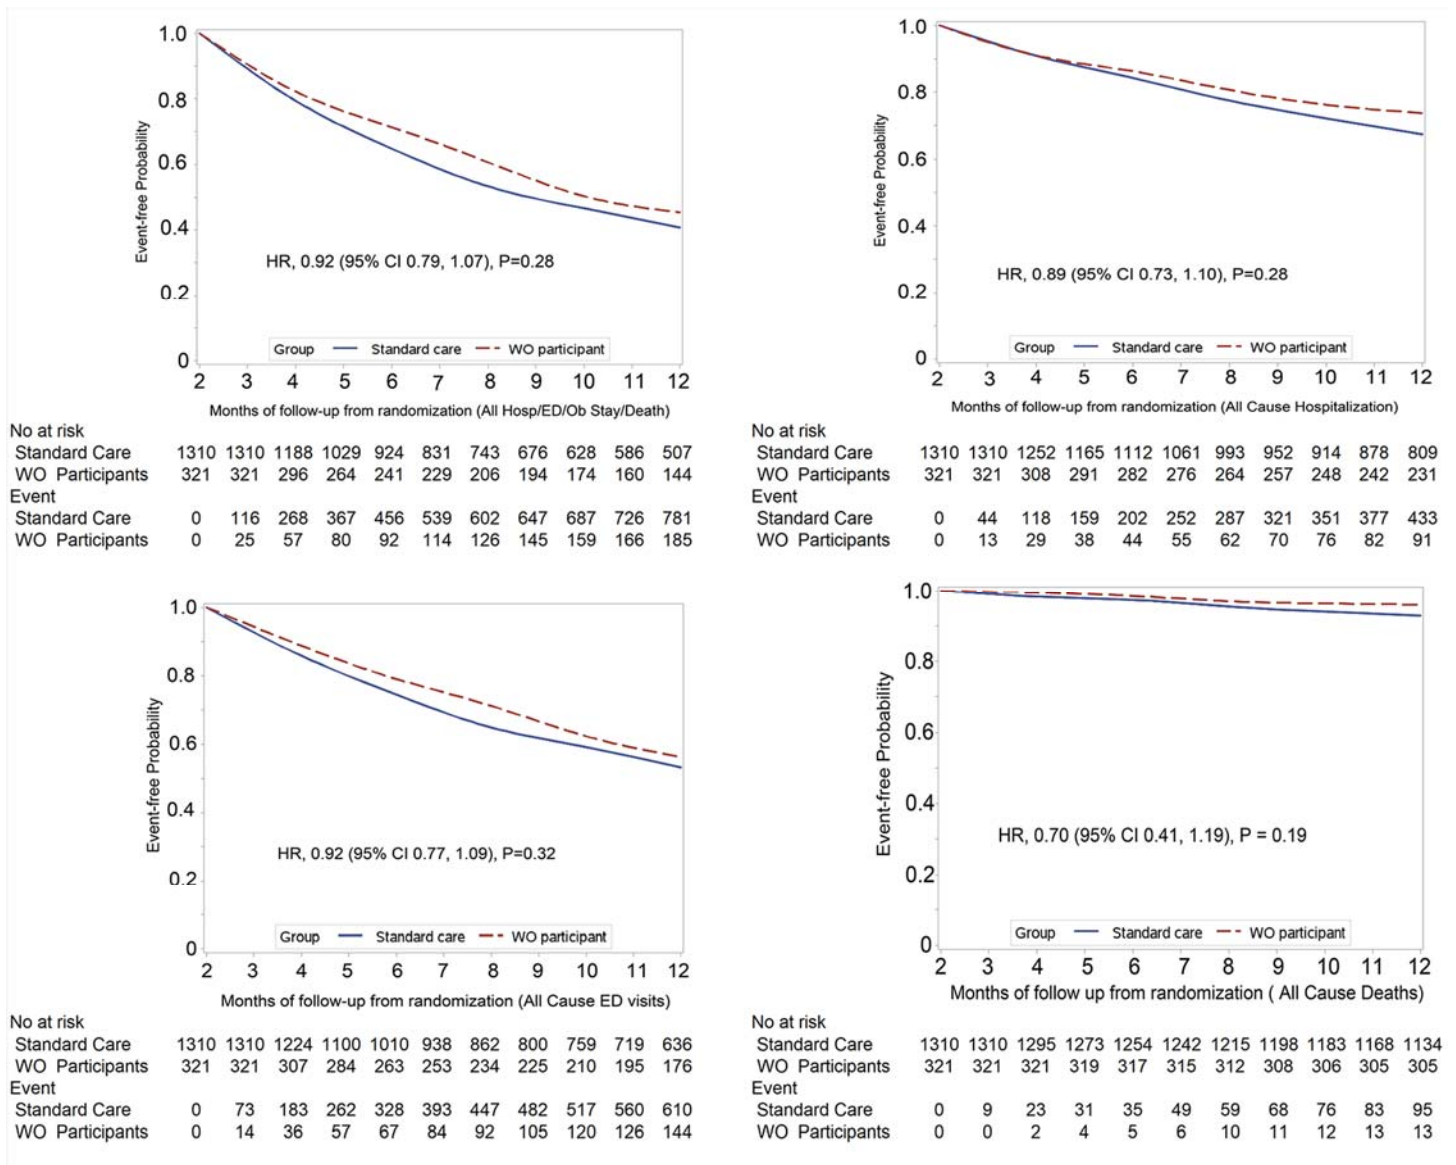

HR indicates hazard ratio. Number of events represents cumulative events and adjusted HRs and P values are from proportional hazards, stabilized propensity score inverse probability of treatment weighting (IPTW) regression models. Logistic regression was used to generate propensity scores using all available baseline characteristics (socio-demographics, health behaviors, disease severity, comorbidities, inhalers/medications, clinical biomarkers and health care utilization in the prior year) to balance the groups; SC patients not included in the as-treated analysis due to disenrollment (n=17) and deaths (n=22) in the first 2 months after randomization. Observation stays [HR, 0.72 (95% CI 0.53, 0.98), P=.04] and COPD-related acute care utilization [HR, 0.94 (95% CI 0.75, 1.17), P=.57] are not presented in the figures.
